1 **Title: Sharks, Lies, and Videotape: A content analysis of 32 years of Shark Week**  
2 **documentaries**

3

4 **Short title:** A content analysis of 32 years of Shark Week

5

6 **Authors:** Lisa B. Whitenack<sup>1\*</sup>, Brady L. Mickley<sup>2</sup>, Julia Saltzman<sup>3,4,5</sup>, Stephen M. Kajiura<sup>6</sup>,  
7 Catherine C. Macdonald<sup>4,5</sup>, and David S. Shiffman<sup>7</sup>

8

9 **Affiliations:**

10 <sup>1</sup>Departments of Biology & Geology, Allegheny College, Meadville, Pennsylvania, United States  
11 of America

12 <sup>2</sup> Department of Environmental Science, Allegheny College, Meadville, Pennsylvania, United  
13 States of America

14 <sup>3</sup> Department of Biological Sciences, University of New Hampshire, Durham, New Hampshire,  
15 United States of America

16 <sup>4</sup>Field School, Coconut Grove, Florida; United States of America

17 <sup>5</sup>University of Miami Rosenstiel School of Marine and Atmospheric Science, Miami Florida;  
18 United States of America

19 <sup>6</sup>Florida Atlantic University, Boca Raton, Florida; United States of America

20 <sup>7</sup>Arizona State University New College of Interdisciplinary Arts and Science, Glendale, Arizona,  
21 United States of America

22

23 \*corresponding author

24 Email: [lwhitena@allegheny.edu](mailto:lwhitena@allegheny.edu) (LBW)

25

26 **Abstract:**

27

28 Despite evidence of their importance to marine ecosystems, at least 25% of all chondrichthyan  
29 species are estimated or assessed as threatened with extinction. In addition to the logistical  
30 difficulties of effectively conserving wide-ranging marine species, shark conservation is believed  
31 to have been hindered in the past by public perceptions of sharks as dangerous to humans. Shark  
32 Week is a high-profile, international programming event that has potentially enormous influence  
33 on public perceptions of sharks, shark research, shark researchers, and shark conservation.  
34 However, Shark Week has received regular criticism for poor factual accuracy, fearmongering,  
35 bias, and inaccurate representations of science and scientists. This research analyzes the content  
36 and titles of Shark Week episodes across its entire 32 years of programming to determine if there  
37 are trends in species covered, research techniques featured, expert identity, conservation  
38 messaging, type of programming, and portrayal of sharks. We analyzed titles from 272 episodes  
39 (100%) of Shark Week programming and the content of all available (201; 73.9%) episodes. Our  
40 data demonstrate that the majority of episodes are not focused on shark bites, although such  
41 shows are common and many Shark Week programs frame sharks around fear, risk, and  
42 adrenaline. While anecdotal descriptions of disproportionate attention to particular charismatic  
43 species (e.g. great whites, bull sharks, and tiger sharks) are accurate and supported by data, 79  
44 shark species have been featured briefly at least once. Shark Week's depictions of research and  
45 of scientists are biased towards a small set of (typically visual and expensive) research  
46 methodologies and (mostly white, mostly male) scientists, including presentation of many white  
47 male non-scientists as experts. While sharks are more often portrayed negatively than positively,  
48 limited conservation messaging does appear in 53% of episodes analyzed. Results suggest that  
49 as a whole, while Shark Week is likely contributing to the collective perception of sharks as  
50 monsters, even relatively small alterations to programming decisions could substantially improve  
51 the presentation of sharks and shark science and conservation issues.

52

## 53 **Introduction**

54

55 Shark species can make important contributions to the resilience, structure, and function of  
56 marine ecosystems (1,2). The loss of shark populations has the potential to influence prey  
57 abundance, diversity, behavior, and genetics, although the nature and extent of that influence  
58 varies based on ecological context (reviewed in Ferretti et al. 2010). At least 24 percent of all  
59 chondrichthyan species (sharks, rays, skates, and chimeras) are assessed as or estimated to  
60 be Threatened with extinction (3-5), primarily due to overfishing (6,7). Conservation of shark  
61 populations is challenging given life history characteristics including slow growth, late age at  
62 maturity, and relatively low fecundity (8). Management is further complicated by the reality that  
63 shark fisheries globally are often under-managed, enforcement resources are typically limited,  
64 many species are highly mobile through multiple management jurisdictions, and sharks can  
65 represent an important food source, especially in subsistence fishing communities (3).

66

67 In addition to the biological, ecological, and practical difficulties of effectively conserving sharks,  
68 shark conservation is believed to have been hindered in the past by public perceptions of sharks  
69 as dangerous to humans (9), including portrayals suggesting that they are evil or vicious (10).

70 One of the primary ways that the public (defined here as people who are not shark scientists,  
71 marine scientists, or aquarists) obtains their knowledge about sharks is through the media,  
72 including news stories, social media, and television programs (11,12). Although negative  
73 images of sharks predate the modern era, with sharks featured as villains in many famous  
74 works of art and literature (e.g. Copley's *Watson and the Shark* (1778) or Hemingway's *The Old*  
75 *Man and The Sea* (1952)), the movie *Jaws* (1975) marked a shift towards modern presentations  
76 of sharks with a visceral visual immediacy. These negative portrayals have been reinforced over  
77 decades by media reporting focused overwhelmingly on shark bite incidents and by "attack"

78 focused movies and television programs (10,13-15). This media landscape contributes to a  
79 collective public conceptualization of sharks as bad, dangerous man-eaters (16,17).  
80  
81 Public perceptions of sharks may affect shark conservation efforts directly or indirectly, by  
82 altering public attitudes or by shaping public knowledge and support for particular policies  
83 (9,18). In addition to a primary focus on covering shark bites (14), reporting on sharks in  
84 newspapers focuses attention on particular threats to sharks and disproportionately discusses a  
85 relatively small number of charismatic species, regardless of conservation status--potentially  
86 leading to failures to direct attention to the most serious conservation challenges or most  
87 threatened species (19). In a participatory democracy, conservation policy change often  
88 requires public support, and fame is likely to have both costs and benefits in terms of  
89 conservation attention and support (18,20).  
90  
91 Shark Week, an annual event from Discovery Communications, has played a large role in  
92 shaping public perceptions of sharks since 1988. Shark Week is the highest-profile coverage of  
93 marine biology or ocean conservation on American television, and represents the greatest  
94 temporary increase over baseline in Americans paying attention to any ocean science topic  
95 (21,22). In 2020, over 21 million viewers tuned in and 37% of those viewers did not watch the  
96 Discovery Channel in the month prior to Shark Week (23). Social media mentions occur in the  
97 hundreds of thousands each year during Shark Week, as do notable spikes in Wikipedia  
98 searches about sharks (21). Therefore, this long-running programming event has potentially  
99 enormous influence on public perceptions of sharks, shark research, shark researchers, and  
100 shark conservation; it may be the only time that many people think about these topics at all  
101 during a typical year.  
102

103 Shark Week has received regular criticism for poor factual accuracy, fearmongering, bias, and  
104 inaccurate representations of science and scientists (e.g. (24-27)). Multiple scientific experts  
105 have reported that their words were selectively edited to make it appear that they were  
106 responding to questions they were not asked, or that they found the way they were presented in  
107 Shark Week programs profoundly professionally embarrassing (28,29). In 2010, in response to  
108 criticism, Discovery Communications agreed to reduce entertainment programming during  
109 Shark Week and present more scientifically-oriented episodes, though many of these more  
110 scientific programs continued to depict sharks negatively (30).

111  
112 Fictional programming from Shark Week has also generated scientific criticism, with shows like  
113 *Megalodon: The Monster Shark Lives* (2013), *Megalodon: The New Evidence* (2014), and *Shark*  
114 *of Darkness: Wrath of Submarine* (2014), presenting fictional storylines featuring CGI and actors  
115 pretending to be scientists and government officials, without clear communication to the viewer  
116 that these programs are not factual (e.g. (31,32)). According to a post-show social media poll  
117 following *Megalodon: The Monster Shark Lives*, 79% of respondents reported believing that  
118 *Otodous megalodon* was still alive (31), despite the fact that all scientific evidence suggests that  
119 *O. megalodon* went extinct over 2 million years ago (33,34). These types of programs not only  
120 present inaccurate information in ways that may reduce trust in science and scientists (e.g. (35),  
121 but through their depiction of scientific and government collusion to hide the truth, join broader  
122 sociological trends towards belief in conspiracy theories, which can undermine confidence in  
123 previously undisputed facts and limit the potential for social consensus-building around a wide  
124 range of important issues (36).

125  
126 Defenses of Shark Week have typically fallen into two primary categories: firstly, that the most  
127 problematic elements of Shark Week are also essentially harmless (e.g., that no-one expects  
128 Shark Week to offer accurate information or believes what they see there (Shiffman, pers.

129 obsv.)). Not-yet-published data suggests that this is not the case, and that the public generally  
130 perceives Shark Week as an accurate source of information about sharks (Wester et al. pers.  
131 comm.). It is well established that reality television and info- or edu-tainment programming can  
132 have real-world effects on public understanding of issues. Evidence suggests that exposure to  
133 pseudoscientific television programming predicts pseudoscientific beliefs (e.g. (37,38), and that  
134 regular exposure to reality TV featuring the paranormal predicts endorsement of paranormal  
135 beliefs (39). Sixty-eight percent of pregnant women reported watching reality television shows  
136 about pregnancy and birth, and 72% of those women who were pregnant for the first time said  
137 that reality television could help them understand what it was like to give birth, although these  
138 shows disproportionately focus on medically- and technologically-assisted birth, present birth as  
139 dangerous, and frame women's bodies as incapable (40,41). Reality TV filming locations have  
140 been reported to have substantial effects on tourist destination choice and demand for particular  
141 locations (42). Television viewing shapes adolescent's beliefs about the risks of alcohol  
142 consumption and their intention to drink (43). The power of media has become especially  
143 apparent this past year during the COVID-19 pandemic, as 2020 was marked by the  
144 propagation of medical disinformation and conspiracy theories across social media, with an  
145 estimated 30% of the U.K. and U.S. populations subscribing to COVID scientific conspiracy  
146 narratives (44). These and many other similar examples refute arguments that Shark Week  
147 programming can have no meaningful real-world impact on sharks, shark science, or shark  
148 conservation.

149  
150 Secondly, defenders of current programming have argued that alternatives do not exist (e.g.,  
151 that it is impossible to include more diverse representations of shark scientists because  
152 available shark scientists are all white men (27) or that audience demand will not allow for more  
153 conservation or science-focused programs (45)). These arguments are undermined by the  
154 existence of organizations like Minorities in Shark Science (MISS;(46)) which to date has over

155 300 members that identify as women of color (Graham, pers. comm.), and the popularity of  
156 factual, documentary television nature programming like that found on the BBC (as opposed to  
157 the more “hybrid” programming combining factual and non-fiction or fictional genres (47) often  
158 seen on Shark Week). While viewership for the Blue Planet II series was notably lower in the  
159 U.S. than in the U.K., each episode had approximately 3 million viewers (48).

160

161 Shark Week represents a significant opportunity for public engagement with shark science and  
162 conservation for a large and enthusiastic audience. Between 2014 and 2017, the Twitter  
163 discourse regarding sharks shifted from negative or slightly negative to slightly positive or  
164 positive during Shark Week air dates compared to non-Shark Week parts of the year (49) .

165 Documentary programming can shape public opinion about conservation-relevant issues,  
166 particularly in concert with other reinforcing information or events, sometimes resulting in pro-  
167 environmental policy and management changes (50). With adjustments to some choices about  
168 programming, Discovery Communications could substantially improve their messaging about  
169 science, sharks, and shark conservation and increase representation of diverse scientists on  
170 television.

171

172 The goal of this research was to quantify some of the reported trends in Shark Week  
173 programming, analyze the content and titles of Shark Week episodes to determine if there are  
174 trends in species covered, research techniques featured, expert identity, conservation  
175 messaging, type of programming, and portrayal of sharks. This quantitative analysis of the key  
176 features of Shark Week’s 30+ year run will provide better data from which to discuss current  
177 practices and recommend improvements.

178

179 **Methods**

180

181 *Title Analysis*

182 Titles from all Shark Week episodes from 1988 to 2020 were collected from two online sources:  
183 thetvdb.com (2021) and the Washington Post (1994) (N=272). Each title was subjectively  
184 analyzed to determine whether it contained words evoking negative connotations or if the title  
185 could be taken as negative within context. Individual title words were searched within the list of  
186 Affective Norms for English Words (ANEW) (51). Title words that scored below the mean for  
187 valence (ranging from pleasant to unpleasant) or above the mean for arousal (ranging from  
188 calm to excited) were considered as eliciting a negative effect. These titles often included words  
189 associated with violence (wrath, fury), fear (terror, fear, scream), death (deadly, death, killer),  
190 danger (danger, dangerous), or attacks (shark attack, shark bite).

191  
192 In addition to analyzing individual words within titles, whole titles were analyzed in context. This  
193 allowed some titles that contained no negative words from the ANEW list to be categorized as  
194 negative based upon the construction of the title, such as “Rogue Shark”, “Jaws Strikes Back”,  
195 or “Lair of the Mega Shark”. Titles that contained the word “Jaws” were treated as negative  
196 since the word was deliberately chosen based on its association with the eponymous movie.  
197 Episodes from the “Air Jaws” series were not treated as negative unless other parts of the title  
198 had a negative connotation, as this series already has a reputation for not being negative. The  
199 list of titles was independently analyzed by a public relations professional in the same manner to  
200 confirm our subjective analysis.

201  
202 The total number of titles, and number of negative titles was counted for each year and the  
203 proportion of negative titles was calculated. Each title was stripped of punctuation and  
204 decomposed into individual words. Singular and plural words were grouped together (eg. Shark,  
205 Sharks) and root words with various suffixes were also grouped together (eg. Kill, Killer, Killing).



206 The frequency of occurrence of words and word groups was sorted from most to least frequent  
207 for all years combined. Lines of best fit were calculated in Excel®.

208

### 209 *Episode Analysis*

210 For the purpose of this study, obtainable episodes (N=201, 73.9% of all aired Shark Week  
211 episodes; Supplement 1) of Discovery Shark Week® from 1988-2020 were watched by four  
212 trained coders (LBW, BLM, JS, and DSS). Episodes which were analyzed were obtained from a  
213 variety of online sources (i.e., Hulu®, Amazon Prime®, Discovery+®, YouTube®, Vimeo®),  
214 library loans, and private holdings. Episodes from earlier years were watched on VHS tape.  
215 Those which were not coded were not obtainable via any of the aforementioned platforms,  
216 despite extensive online searches between 2019 and 2021.

217

218 A code book was developed by all coauthors, which is described in detail in Supplement 2. The  
219 coding process included the following areas of interest: A) documentary title, B) documentary  
220 year, C) production company, D) locations of filming, E) species of chondrichthyans (sharks,  
221 rays, skates, chimeras) featured, F) featured experts/hosts of the show, G) general type of  
222 documentary, H) research methods featured, I) purpose/goal of documentary, J)  
223 accomplishment of goal/purpose, K) mention of shark conservation, L) mention of shark finning,  
224 M) mention of shark meat, N) mention of ways to help sharks, O) negative portrayal of sharks,  
225 P) positive portrayal of sharks, Q) portrayal of sharks other than negative or positive, R) mention  
226 of specific misconceptions (e.g., “bull sharks are the only sharks that can enter freshwater” and  
227 “sharks can smell a drop of blood from a mile away”), S) anything else about a given episode  
228 that coders found noteworthy including space for coders to note variables that they were unsure  
229 about. Most variables were binary (presence/absence), which minimized the chance of coding  
230 error or coding agreement problems resulting from interpretation.

231

232 Prior to data collection, all coders completed analysis of the same three episodes to check for  
233 intercoder reliability and assess whether the coding tool was working as intended. There were  
234 no differences in quantitative coding or results. Coders filled out the same structured coding  
235 form in Google Forms® for each episode, filling in applicable information throughout the  
236 duration of the show. Each episode was coded by one coder. Only one coder (LBW) appeared  
237 in an episode, which was assigned to a different coder. A single coder (DSS) acted as arbitrator  
238 to minimize error resulting from coder uncertainty and to make decisions on any variables that  
239 were coded unclearly.

240 .

#### 241 *Hosts/Expert Analysis*

242 Not-yet-published data from a recent survey done by Wester et al. indicate that Shark Week is  
243 perceived by the public as a reputable source of information on sharks and conservation  
244 (Wester, pers. comm.). To better understand the sources of expert perspectives offered by  
245 Shark Week, we assessed the academic research productivity of those identified onscreen as  
246 “experts”, “scientists”, and “researchers” as a rough proxy for recognized scientific activity. We  
247 used Google Scholar to determine the number of peer-reviewed publications (as of July 9,  
248 2021) authored by each Shark Week expert/scientist. Because scientific journal publications are  
249 not the only evidence of scientific expertise, we also counted authorship of peer-reviewed book  
250 chapters and edited books, peer-reviewed abstracts from conferences, and government reports.  
251 Popular press books and magazine articles were not included. We sorted expert scientific  
252 productivity into bins based on number of publications (0, 1-5, 6-15, 16-25, 26-50, 50+  
253 publications). Fictional experts were removed from the analysis (i.e. fictional scientist “Colin  
254 Drake” from the megalodon episodes).

255

256 In order to assess the gender and racial diversity of non-fictional hosts/experts, we conducted  
257 Google® searches for biographies, news articles, or social media profiles of each host/expert.

258 We successfully located sources for all 204 non-fictional hosts/experts. The pronouns used in  
259 these sources were used to determine their gender, with the caveat that this allows us to speak  
260 only to broad trends in gender representation on Shark Week, not to the individual gender  
261 identities of particular experts. We recognize that people may be misgendered in sources that  
262 they did not write themselves.

263  
264 We assessed host/expert race based on how they would likely be perceived by U.S. audiences,  
265 with the exception of the small number of hosts/experts who mention their race in public  
266 biographies or platforms (i.e., on Twitter #BlackinMarineScience or #LatinxinSTEMWithout).  
267 Because names are a poor predictor of racial identity, we did not consider names in this  
268 analysis . Without drawing any conclusions about individual identities, this allowed us to develop  
269 an approximate estimate of the proportion of hosts/experts who can be assessed as white or  
270 white-passing.

271  
272 *Species Analysis*  
273 After all episodes in the study were coded, we collected the following additional information on  
274 each shark species appearing in the episode: A) maximum recorded size (Castro, 2011), B)  
275 IUCN Red List Status ([iucnredlist.org](http://iucnredlist.org)), C) taxonomic order. All species appearing on screen and  
276 also mentioned by name in narration were recorded, regardless of total screen time and  
277 regardless of whether that species was discussed meaningfully during the episode, thus results  
278 over-represent the coverage of less commonly featured species (e.g. a blacknose shark that  
279 appeared for ten seconds in an episode largely about tiger sharks would yield the same results  
280 as an episode that featured both blacknose and tiger sharks equally).

281  
282 *Assessment of Scientists Attitudes toward Shark Week*

283 A survey of expert shark researcher’s perspectives on shark conservation policy (51) included  
284 questions concerning perspectives on the role of media coverage in shaping public  
285 understanding of sharks. These results were collected with the approval of the University of  
286 Miami Human Subjects Research Office Institutional Review Board protocol 20130730, but have  
287 not previously been published. In this survey, experts are defined as members of professional  
288 scientific societies focusing on sharks and their relatives, including the American Elasmobranch  
289 Society, the Oceania Chondrichthyan Society, and the European Elasmobranch Society.  
290 Questions whose answers we report here are “How significant do you feel that public attitudes  
291 towards sharks are in terms of shaping public policy?” and “In your opinion, does the  
292 mainstream media accurately portray shark science and conservation issues?”

293

## 294 **Results & Discussion**

295

### 296 *Title Analysis & Programming Trends*

297 Between 1988 and 2020, there were 272 unique Shark Week program titles (Supplement 1).  
298 For the first 15 years the number of original programs each year did not exceed seven. The  
299 number of programs began to increase dramatically after 2010, with the greatest number of  
300 unique programs (24) produced in 2018 and 2020 (Fig 1). Over half (51.8%) of all Shark Week  
301 programming was produced in the past eight years (2013-2020). The increase in the number of  
302 titles each year is best fit with an exponential function ( $y = 2.290e^{0.0622x}$  where  $x = \text{year } 1-33$ ,  $r^2 =$   
303  $0.882$ ). Overall, 59 titles (21.7%) used words with negative connotations, based on the ANEW.  
304 Although the number of titles produced increased exponentially, the number of titles with  
305 negative words each year ranged between zero and five and increased less dramatically ( $y$   
306  $= 1.204e^{0.039x}$  where  $x = \text{year } 1-33$ ,  $r^2 = 0.449$ ). When titles were analyzed within context, 42.6%  
307 of all titles were categorized as negative. The number of negative titles increased proportionally

308 with the total number of titles as an exponential function ( $y = 0.938e^{0.074x}$  where  $x = \text{year } 1-33$ ,  $r^2$   
309  $= 0.850$ ).

310

311 *Fig 1. Trends in Shark Week episode titles. (A) Frequency of negative words used in episode*  
312 *titles; (B) Percent of episodes with negative titles per year. Orange circles indicate episode titles*  
313 *coded as negative based solely on the ANEW, blue squares indicate episode titles coded as*  
314 *negative by authors based on context; (C) Number of episodes with negative titles per year.*  
315 *Black circles indicate total number of episodes aired each year, orange circles indicate episode*  
316 *titles coded as negative based solely on the ANEW, blue squares indicate episode titles coded*  
317 *as negative by authors based on context.*

318

319 The proportion of titles that were assessed as having negative connotations ranged from 0-75%  
320 in any given year (Fig 1). During the first five years of programming (1988-1992) only two titles  
321 were considered negative. In total, six non-consecutive years, (1990, 1991, 1992, 1995, 1998,  
322 2000), representing 18.2% of the time examined, had no negative titles. The last year in which  
323 there were no negative titles was 2000. In contrast, at least half of the program titles each year  
324 were considered negative for twelve years, which represents 36.4% of the time examined. The  
325 years in which at least half of the program titles were negative were: 1997, 2001, 2002, 2007,  
326 2010, 2011, 2013, 2014, 2016, 2016, 2018, and 2020. The greatest number of negative titles  
327 was found in 2018 (14) and 2020 (12). These two years both produced the greatest number of  
328 programs (24 each year) and combined they represent 17.6% of all Shark Week programming  
329 since inception.

330 Title length ranged from one to eight words, with four word titles occurring most frequently. One  
331 hundred seventy-three titles (64.6%) included the root word “shark”. While 99 of the titles

332 (36.4%) did not include the root word “shark”, many of these titles referred to a specific species,  
333 such as “Great White Encounters” or, “Search for the Golden Hammerhead”. Sixteen titles  
334 (5.9%) were merely descriptive and used the format, “Sharks of xxx”, where the xxx denotes a  
335 location.

336 The 272 program titles were composed of 1047 total words. There were 354 unique words,  
337 including root words plus their derivatives. The words “shark” and “sharks” occurred the most  
338 frequently (161 occurrences) and accounted for 15.4% of all title words. This was followed by  
339 the prepositions “of” (6.5%) and “the” (5.6%), then “jaws” (3.2%), “great” (2.8%), “white(s)”  
340 (2.6%), and “attack(s)” (1.4%). “Attack(s)” was the most frequently occurring word that has a  
341 negative connotation based on the ANEW list, and “jaws” was the most frequently occurring  
342 word that has a negative connotation in context (Fig 2).

343

344 *Fig 2. Frequency of occurrence of title words. The word “Shark(s)” occurred 4.7 times more*  
345 *frequently than the next most common word, “Jaws”, and was omitted from the word cloud.*  
346 *Prepositions were also omitted, along with words that occurred only once. Words with a*  
347 *negative connotation are depicted in red and font size reflects frequency of occurrence.*

348

349 The number of negative titles for Shark Week shows increased at a lower rate (for words from  
350 the ANEW list) or at a similar rate (for titles taken in context) to the total number of titles. The  
351 number of negative titles based on the ANEW list did not exceed five per year, despite a  
352 dramatic increase in the total number of programs produced. For the first 15 years, all programs  
353 with negative titles were derived from words within the ANEW list. However, more recently, the  
354 number of negative titles in context has increased at a greater rate than the number of titles with  
355 negative words from the ANEW list. This suggests that titles are being constructed to avoid

356 negative words, but are still depicting sharks in a sensationalized, potentially negative light  
357 when taken in context.

358 Some words that have a negative connotation in isolation can be rendered neutral in context.  
359 For example, an existing franchise entitled, “Naked and Afraid” produced episodes for Shark  
360 Week in 2018 and 2020 with the title, “Naked and Afraid of Sharks”. In this case the franchise  
361 title already included the word “afraid” so these titles were not included in the list of negative  
362 titles. However, taken in isolation, the title “Naked and Afraid of Sharks” would be considered to  
363 be a negative title. Similarly, the word “monster” is recognized as negative, but a program  
364 entitled “Monster Garage: Shark Boat” used the word “monster” to describe a garage, not  
365 sharks. In this case the title was not classified as negative. The word, “monster” can also refer  
366 to something that is very large, so programs like, “Monster Mako”, can refer to a particularly  
367 large mako shark. However, the word “monster” in this and similar titles was likely chosen to  
368 elicit fear and titles which used words like “monster” to describe sharks themselves were  
369 classified as negative despite some ambiguity around their meaning.

370 The word “Jaws” is unique in the context of Shark Week titles. Nearly all vertebrates possess  
371 jaws, so the word is not considered negative in itself. However, the 1975 movie “Jaws” caused  
372 people to associate the word with a killer shark. The word thus evokes a primal fear of being  
373 attacked, bitten, or eaten. Titles that include the word “Jaws” take advantage of this association  
374 by indirectly suggesting that the subject is dangerous or fear-inducing, without having to use  
375 words that are explicitly negative. Therefore, titles that included the word “jaws”, other than “Air  
376 Jaws”, were classified as negative within context.

377

378 There has been a recent trend to amalgamate “shark” with root words that have a negative  
379 connotation. This creates chimeras such as Sharkzilla (2012), Sharkpocalypse (2013),  
380 Sharkageddon (2014), Sharksanity (2014, 2015, 2016), and Sharkwrecked (2018, 2019). None

381 of these fabricated words would appear in the ANEW list so they were analyzed within context.

382 While the root words “apocalypse”, “armageddon”, and “shipwreck” are not included in the

383 ANEW list, the root word “insane” is listed and does have a negative connotation (52).

384

385 *Episode analysis*

386 General content

387

388 201 episodes were watched, coded, and scored, though not every variable was present in every

389 episode. A plurality of episodes were broadly categorized as being about “Research” (37%) or

390 “Natural History” (16%) (Fig 3). Our definition of research was very broad and essentially

391 included any attempt to obtain the answer to any question about shark biology or behavior via

392 observation or experimentation. Many of the episodes categorized as research include atypical

393 or unscientific methods, attempts to answer questions long considered resolved in the peer-

394 reviewed scientific literature, or experimental design that would likely not be considered

395 scientifically valid if presented in an academic journal or conference. Episodes that focused on

396 reenactments of sharks biting people (“Shark bites”) and episodes with no purpose beyond

397 people diving with sharks (“Diving with sharks”) each represented about 15% of all episodes.

398 Episodes about mythical/legendary sharks represented about 7% of all episodes. When

399 analyzed by year, we found no trends in programming; episodes have not become more or less

400 focused on science or shark bites over time (Fig 4). However, we note that “research” themed

401 programming was 25% or less in several years, including several consecutive years leading up

402 to the fictional megalodon episodes (2009-2012) and the most recent year analyzed in this

403 study (2020).

404

405 *Fig 3. Number and percent of episodes by documentary class.*

406



407 *Fig 4. Percent of episodes categorized by “Research” (orange line), “Shark Bites” (green line),*  
408 *or “Swimming with Sharks” (blue line).*

409

410 A focus on shark bites, shark-related danger, and mythical, legendary, or fictional monster  
411 sharks reflects, at least in part, the use of violence or fear as a marketing tool. Violent  
412 programming is a market differentiator known to attract advertiser-desired demographics,  
413 particularly 18-34 year old males (53). Hamilton (53) describes this tendency as an  
414 economically rational and self-interested act by networks, despite creating negative externalities  
415 for society that are not borne by the producers or programmers who are making decisions about  
416 content. It is also possible that the creation of frustrated and vocal constituencies opposed to  
417 inaccurate and fear-mongering programming, including opposition from scientists and  
418 conservationists, is part of an overall marketing strategy in which critique drives further public  
419 attention and viewership to even highly problematic content. Controversy and social media  
420 discussion are strongly positively correlated with sales performance, although strong and  
421 consistent negative word of mouth feedback may harm perceptions of a brand (54). This  
422 argument is supported in the context of Shark Week in particular by O’Donnell’s observation  
423 that the year that aired the fake megalodon documentary (2013) was also the year that  
424 generated the greatest volume of Twitter discussion about Shark Week (49).

425

#### 426 *Research Methods*

427

428 18.3% of Shark Week episodes featured no real research methods of any kind, which is the  
429 most common “research” category (Fig 5). Among episodes that did include research methods,  
430 methods featured tended to be simple, declarative and visual, such as satellite tagging large  
431 charismatic animals. The most common methods were satellite telemetry tagging, acoustic  
432 telemetry tagging, or use of high-tech camera equipment including drones, ROVs, BRUVs, or

433 ultra-high-speed cameras; when added together these techniques were featured in  
434 approximately 40% of episodes. Some of this high-tech camera equipment is non-standard in  
435 published scientific research and was used in these episodes to obtain high-quality imagery for  
436 television, rather than scientific research purposes. While we note that examples of published  
437 studies using high-tech camera equipment does exist (as reviewed in 55), the definition of  
438 “research method” used here was inclusive of activities that would not meet the scientific  
439 threshold for “research”.

440

441 *Fig 5. Number and percentage of occurrences of particular research methods in Shark Week*  
442 *episodes.*

443

444 Research with high-tech equipment such as ROVs and satellite telemetry tagging is also  
445 expensive, which translates into featuring well-funded and prominent (often white and male)  
446 researchers. These research methodologies typically require more grant, donor, or personal  
447 funding, which is easier to access for scientists with some degree of seniority and influence and  
448 institutional support. Other methodologies producers consider less visually appealing may be  
449 more likely to be performed by scientists working with limited resources, including early career  
450 researchers, scientists at less wealthy institutions, or those from less wealthy countries, making  
451 them less likely to be featured in Shark Week episodes. Compensation for Shark Week  
452 appearances may also exacerbate these differences; scientists requesting industry-minimum  
453 pay for their appearances can be passed over in favor of those who have more financial  
454 resources and therefore may not need the additional funds (Jewell, pers.comm.). Appearing on  
455 Shark Week programming can have positive benefits for researchers, including increased  
456 visibility at home institutions and in the media, increased professional opportunities, and  
457 additional research funds or resources (56). The research methods featured in Shark Week are  
458 also notably distinct from the most common methods used in scientific investigations (57), which

459 are dominated by age and growth, life history, and reproductive biology work (although see (55)  
460 for a review on the use of drones in shark research) While perhaps not as camera friendly, this  
461 kind of work is vital to generate data for the sustainable management of shark species, and the  
462 fact that commonly conducted, management-relevant science is rarely featured could impact  
463 public understanding of the purpose, function, and social relevance of marine science and the  
464 scientific process.

465

466 In addition to focusing on a very limited range of existing research techniques, television  
467 programming often presents science and scientific discovery as reporting unquestionably true  
468 facts rather than as generating knowledge through human-led iterative processes (58). A  
469 significant disconnect has been found between scientists (who generally described science on  
470 television as failing to reflect the practices and methods of science), and those working to  
471 produce science programs for television, who believed reflecting uncertainty and methodological  
472 processes in science television programs would undermine confidence in science, and  
473 negatively affect ratings and audience interest (58). In general, media producers have reported  
474 wanting to feature experts who are authoritative, confident, and willing to court controversy--all  
475 characteristics which do not necessarily align with effectively conveying scientific knowledge or  
476 nuance (59). These are also masculine-coded characteristics and women may receive  
477 gendered hostility for displaying them or be more likely to be professionally penalized by senior  
478 male colleagues for them, perhaps explaining why women experts are generally more hesitant  
479 to appear on television than their male colleagues (59); for more discussion of misogyny in  
480 shaping perceptions of female leadership and expertise, see (60,61).

481

482

483 *Featured experts*

484

485 Shark Week episodes often repeatedly rely on a subset of hosts/experts; 102 of the 229  
486 hosts/experts were featured in more than one episode. Of those, 80 were featured 2-5 times, 13  
487 were featured 6-10 times and nine were featured more than 10 times. Eight of the nine  
488 host/experts were featured in between 10 and 19 episodes, with one person featured in 43  
489 different episodes.

490

491 22.7% of the 204 people billed as an expert, scientist, or researcher by Shark Week have no  
492 peer-reviewed publications (Fig 6). 14.4% of featured experts have between one and five  
493 scientific publications, and although some of these individuals are early career researchers,  
494 many are people who are not working professionally in science. For example, one  
495 cinematographer is a coauthor on two scientific publications but is primarily not a scientist.  
496 However, just over 41% of experts featured have more than 26 peer-reviewed publications.  
497 Although the metric of publications is an imperfect measure of scientific and research  
498 contributions, it does provide a general sense of whether someone is actively engaged in  
499 publishable scientific research. However, publication metrics and credentials may not be central  
500 to television representations of expertise. On U.S. talk shows, experts--particularly "intellectual  
501 experts"---are subject to "levelling," or being treated in ways that present them as equivalently  
502 knowledgeable as non-experts. They are often brought on late in an episode, featured alongside  
503 non-experts, given little time to speak, frequently interrupted, and may be challenged or  
504 disagreed with (62). In some sense Shark Week undertakes a similar leveling process, treating  
505 activists, divers, camerapeople and others as having equivalent scientific expertise to  
506 credentialed scientists. Of the nine most frequently featured host/experts, three have no peer-  
507 reviewed publications, including the host with the most Shark Week episodes (43 episodes).  
508 While there are multiple kinds of useful and relevant knowledge, it may be helpful for Shark  
509 Week to more clearly distinguish between scientists and non-scientists (who may well possess  
510 other forms of valuable expertise but should not be presented as scientific authorities). It is also

511 noteworthy that many of the most egregious and harmful factual errors or misrepresentations  
512 highlighted in criticisms of Shark Week came from non-scientists who Shark Week presents as  
513 experts.

514

515 *Fig 6. Frequency of number of scientific publications authored by Shark Week experts.*

516

517 Shark Week programming has previously been criticized for overwhelmingly featuring white  
518 men as experts in their programming (27) and we were left with the same impression after  
519 viewing 201 episodes. 93.9% of experts were perceived by coders as white or white-passing,  
520 with only 6.1% of experts perceived as non-white. 24 out of 201 episodes included at least one  
521 host/expert perceived by coders as non-white; only one episode included more than one  
522 host/expert perceived as non-white. Based on our search, no experts used non-binary pronouns  
523 or publicly mentioned being trans\*. 78.6% of hosts/experts were associated with male pronouns  
524 (an online biography for 2 hosts/experts was not readily available via Google search), whereas  
525 the remaining hosts/experts (20.1%) were associated with female pronouns (Fig 7). 60 of the  
526 201 episodes included at least one host/expert associated with female pronouns. Only 11  
527 episodes included more than one host/expert associated with female pronouns; of these nine  
528 aired between 2016 and 2018 and one each in 2003 and 2004. Of the 35 experts referred to as  
529 “Dr.”, three were associated with female pronouns. We note that two of the male experts  
530 referred to as “Dr.” do not have a Ph.D., D.V.M., or similar degree, and that some experts/hosts  
531 known to have Ph.D.’s were not referred to as “Dr.” The nine hosts/experts who have been  
532 featured in more than 10 episodes are all associated with male pronouns and were perceived as  
533 white or white-passing. We note our results over-represent the coverage experts associated  
534 with female pronouns and experts perceived by coders as non-white; if a female and/or non-  
535 white-passing expert was featured on screen for one episode in an episode where the vast

536 majority of speaking was performed by male and/or white-passing experts, the episode was  
537 counted as featuring a female expert.

538

539 *Fig 7: Percent of episodes including any appearance by an expert/host referred to by female*  
540 *pronouns, by year. The red dashed line indicates 50% for a given year. Overall, 20.1% of*  
541 *hosts/experts were associated with female pronouns.*

542

543 Women are underrepresented in science, filling approximately 26% of jobs, with  
544 underrepresentation even more pronounced among women of color (63). STEM (science,  
545 technology, engineering, and mathematics) fields in general and shark science in particular are  
546 known to suffer from problems with misogyny, harassment, and discrimination (e.g., 56,64,65).  
547 Counter-stereotyping and access to same-race and same-sex role models can play an  
548 important role in making historically excluded groups feel a greater sense of belonging in  
549 science, so availability of role models, including in media, is significant (66-68).

550

551 The selection methods for experts appearing on Shark Week have an important influence on  
552 content. Experts may be selected for media appearances based on a prior existing relationship  
553 with the producer or documentary team, or may be asked to vet or recommend other potential  
554 experts being considered (e.g., 69). As people are most likely to have social networks structured  
555 around homophily (i.e., primarily composed of people similar to themselves (70)); these  
556 recruitment methods can perpetuate a lack of diversity among featured experts. Host/experts  
557 are also found through production teams researching social media or published works, such as  
558 research papers. This is more likely to favor established, senior researchers with a larger  
559 publication record or a higher public profile. It could also result in people with a particularly  
560 active social media presence being featured, whether or not they are scientific experts. The  
561 limitations created by this recruitment process are not necessarily insurmountable; Shark

562 Week's chief competitor, National Geographic's "Shark Fest," has partnered with the non-profit  
563 Minorities in Shark Sciences to improve diversity among their own hosts, while Shark Week has  
564 made no such moves publically as of this writing.

565

566

### 567 *Featured Species*

568

569 Including species that weren't the focus of an episode but were briefly introduced by name on  
570 screen, at least 79 extant (living) species of shark or species groups (e.g. "hammerhead",  
571 "mako", "sevengill", "sixgill", "thresher", "wobbegong") were featured in at least one Shark Week  
572 episode (Fig 8, Supplement 3). Additionally, eight extinct species and 13 species of extant non-  
573 shark chondrichthyans were also featured (10 batoids (rays), 3 holocephalans (chimera and  
574 ratfish)). 46 extant species were featured in more than one episode, 30 appeared in more than  
575 five episodes, and 16 appeared in more than ten episodes. Across all episodes, an average of  
576 4.9 species appeared. 39 episodes showed just one species, and 36 of these single-species  
577 episodes featured only white sharks (*Carcharodon carcharias*).

578

579 *Fig 8: Species appearing in at least 5 Shark Week episodes. Hammerheads were most*  
580 *commonly great hammerheads S. mokarran, though scalloped hammerheads S. lewini and*  
581 *smooth hammerheads S. zygaena were sometimes mentioned. Conservation status reflects*  
582 *that of great and scalloped hammerheads (Critically Endangered); smooth hammerheads are*  
583 *currently assessed as Vulnerable. Mako sharks were almost always shortfin makos Isurus*  
584 *oxyrinchus, but one longfin mako I. paucus was mentioned (both species are Endangered).*

585

586 Across the 201 coded episodes, the most common species featured were white sharks *C.*  
587 *carcharias* (18.4% of all episodes), tiger sharks *Galeocerdo cuvier* (12.2% of all episodes), bull

588 sharks *Carcharhinus leucas* (9.6% of all episodes), and hammerhead sharks Sphyrnidae (8.4%  
589 of all episodes) (Fig 8). Often the specific species of hammerhead was not mentioned, so all  
590 hammerheads were grouped together for analysis; when species were specified, great  
591 hammerheads *Sphyrna mokarran* were featured most often (62.3%) with the occasional  
592 scalloped (21.7%) and smooth (2.9%) hammerheads (*S. lewini* and *S. zygaena*, respectively).

593  
594 The species highlighted show some interesting contrasts with similar analyses of shark species  
595 of interest in scientific publications (57) and popular press (19) coverage. While white sharks  
596 appear in the top five featured species in Shark Week, scientific publications, and popular press  
597 coverage, some of the most-studied species (bonnethead shark *Sphyrna tiburo*, sandbar shark  
598 *Carcharhinus plumbeus*, and spiny dogfish *Squalus acanthias*) are rarely featured in any Shark  
599 Week episodes (5, 7, and 1 episode, respectively) (Supplement 3). Similarly, some of the  
600 species that received the most media attention in popular press articles (19) such as the  
601 porbeagle *Lamna nasus* and basking shark *Cetorhinus maximus* were rarely featured in any  
602 Shark Week episodes (2 and 4 episodes, respectively)(Supplement 3). As in other forms of  
603 popular media, more highly threatened species were not more likely to be featured, with an  
604 overall tendency to large, charismatic, well-known species.

605

#### 606 *Featured localities*

607

608 Though dozens of countries were featured in at least one episode each, a handful of filming  
609 locations dominated. The United States was the most common filming location (24.2% of all  
610 episodes), followed by the Bahamas and South Africa with 15% each, and New Zealand,  
611 Australia, and Mexico with approximately 10% each (Fig 9). Within the United States, 31.5% of  
612 episodes took place in California, followed by Florida (26.7% of episodes), Hawaii (17.8% of  
613 episodes), and Massachusetts (9.6% of episodes). At least one episode took place in nearly



614 every coastal state's waters (except for Delaware, and noting that most shows featured in  
615 Georgia were filmed at the Georgia Aquarium). However, most states other than Florida,  
616 California, Hawaii, and Massachusetts were not featured often, and some states were featured  
617 only once.

618

619 *Fig 9. Shark Week filming locations. (A) Locations by country; (B) Locations within the United*  
620 *States.*

621

622 This geographic focus on just a few countries (and on a relatively small number of locations  
623 within those countries) in part reflects a focus on particular species and researchers, though  
624 Shark Week episodes regularly feature experts who have no particular experience with a  
625 location, but fly in to the location just for filming the episode. Although sharks are circumglobal,  
626 familiar and logistically simple sites in which filmmakers have prior experience or existing  
627 relationships may be favored for filming (71), potentially acting as a factor which contributes to  
628 reducing the diversity of species, locations, narratives, and scientists featured. For example, two  
629 of the top three filming localities have majority Black populations; 91% of the Bahamian  
630 population is Black (72) and approximately 80% of the South African population is Black African  
631 (73). Despite 30% of filming localities being located in these two countries, non-white experts  
632 are rarely featured in Shark Week (this study; 27).

633

634 Messaging

635

636 174 (86.6%) of the coded episodes had a stated goal at the beginning of the episode. Of these  
637 episodes, 64 (36.8%) did not address their stated goals during the course of the episode, and  
638 110 (63.2%) claimed to have accomplished their stated goal. The stated goals varied from  
639 specific research goals to answering general questions about shark behavior (see Supplement

640 2 for examples). If the goal of these episodes is to educate viewers, it is important that they  
641 have a clearly stated purpose and that this purpose is addressed. The fact that this often did not  
642 happen shows that many episodes serve no purpose beyond imagery of sharks.

643

644 148 (73.6%) of the coded episodes included some sort of fear-mongering language or negative  
645 portrayal of sharks. These comments mostly focused on shark bites on humans (Table 1). On  
646 the other hand, 127 (63.2%) of the episodes had at least one mention of sharks as awe-  
647 inspiring, beautiful, misunderstood, or ecologically important (Table 2). Notably, this was often a  
648 brief mention that played over the ending credits, while fear-mongering-type narrative often  
649 occurred throughout the episode.

650

651

652 *Table 1: Representative example dialogue and narration showing sharks in a negative light.*

|                                                                     |
|---------------------------------------------------------------------|
| "Biologists know little of what makes these killing machines tick." |
| "The threat against humans from sharks has never been greater."     |
| "Deadly maneaters lurking in the shadows."                          |
| "You can't outswim a shark, and you can't overpower it."            |
| "Great white sharks can be absolute monsters."                      |
| "The New Jersey shore became a killing ground."                     |
| "Sharks are the stuff of nightmares."                               |
| "Sharks are mindless, monstrous killers."                           |

“Sharks are stalking and killing us from the deep.”

“Great whites keep returning to California to terrorize people.”

“A missile armed with teeth, ready to fire.”

653

654

655 *Table 2: Representative example dialogue and narration showing sharks in a positive light.*

“The balance and health of the ocean depends on their survival.”

“A marine ecosystem is not healthy without top predators.”

“You cannot remove the top predators without affecting every link below.”

“Sharks are misunderstood animals.”

“Sharks are more valuable alive than dead.”

“Gentle giants”

“Great white sharks are one of the most awe-inspiring animals on the planet.”

“Sharks are clearly intelligent, not mindless killers.”

“Seeing a great white breach is one of the most spectacular things in nature.”

“What’s not to love?”

656

657 The language used to describe sharks does matter, as studies have shown that negatively  
658 valenced words like “attack” can contribute to negative public sentiment towards sharks (49,74).

659 Public acceptance of predators is related to the frequency and intensity of interactions

660 (especially negative interactions) with humans, so support for shark conservation is likely to be  
661 related to perceived frequency of bites or human injuries (i.e., “attacks”) (75). Media portrayal of  
662 these issues has indeed been shown to play a role in public support for shark conservation (11).  
663 Muter et al. (14) and Neff and Hueter (74) also found that news stories about sharks largely  
664 focus on fear-mongering and exaggerated stories of sharks biting people rather than on shark  
665 research or conservation. Exposure to violent Shark Week programming has been shown to  
666 induce greater levels of fear of sharks (76), and fear correlates with support for policies, like  
667 shark culls or beach netting, that are harmful to shark conservation (77).

668

669 One area in which Shark Week programming may be effective at reducing fear is through  
670 episodes including neutral and positive interactions with sharks, which have been shown to  
671 improve public perceptions (78). Episodes of Shark Week in the last several years typically  
672 include at least one well-known celebrity interacting with sharks (e.g., Shaquille O'Neal, Will  
673 Smith, Adam Devine, Ronda Rousey, Craig Ferguson). Celebrity actions, opinions, and  
674 endorsements are known to influence the attitudes we adopt and the decisions we make (79),  
675 and in conservation specifically, celebrity endorsement of a cause yields higher willingness-to-  
676 engage amongst the public (80). However, it should be noted that Shark Week’s celebrity  
677 episodes often feature unnecessary artificial danger or inappropriate interactions with animals  
678 such as chasing, riding, or harassing them, which could undermine any positive messaging and  
679 potentially endanger people’s safety (81).

680

681 In terms of specific threats to sharks and shark conservation, 28 episodes (13.9%) mentioned  
682 shark finning or the shark fin trade, and eight (4.0%) mentioned that people eat shark meat.  
683 However, Shark Week episodes are generally lacking in actionable educational content about  
684 shark conservation. 107 episodes (53.2%) at least briefly mention something related to  
685 conservation, often vague statements about shark population decline, the ecological importance

686 of sharks, or extinction risks. Just six episodes (3.0%) mentioned anything specific about shark  
687 conservation policy or specific ways that Discovery’s audience could help; these statements  
688 were mostly about individuals choosing to not eat shark fin soup or releasing sharks they catch.  
689 There was no content encouraging viewers to speak to government officials about specific  
690 ongoing policy discussions, advising them to avoid specific seafoods with shark bycatch,  
691 requesting donations to nonprofits that have a track record of success, or incorporating any  
692 other common advice given by experts to those who want to help conserve sharks. When  
693 suggestions are provided during programming, many of them are not actionable in any way that  
694 could actually be useful to shark conservation efforts, an enormous missed opportunity given  
695 Shark Week’s massive audience and the general lack of public pro-sustainability engagement in  
696 US shark fisheries discussions (82). Past attempts to leverage their audience included a 2014  
697 social media ad with five ways that people could help sharks, which included “report shark  
698 attacks” and “avoid shark fishing in marinas” as suggestions without explanation. The most  
699 specific was “lobby for shark protection,” but no information was provided on who to lobby or  
700 what to ask them to do. Exposing a large audience to vague platitudes is of questionable value  
701 for conservation and may even undermine existing campaigns (82).

702

703

#### 704 *Expert attitudes toward Shark Week*

705

706 A survey of expert shark scientists revealed broad concerns about the role of media  
707 misinformation in general, and Shark Week specifically, in perpetuating misinformation about  
708 shark research and conservation. 102 experts responded to the survey, but not everyone  
709 responded to every question, and therefore the following percentages are relative to the number  
710 of respondents that answered the particular question. Survey respondents generally believe that  
711 public understanding of sharks is a significant factor influencing their conservation. 64% (N=49)

712 of respondents refer to public attitudes towards sharks as significant/important or very  
713 significant/very important to shark conservation. Survey respondents reported being very  
714 concerned about how sharks are portrayed in the media, a primary way that the public becomes  
715 informed about environmental issues. 86% of responses to this question (N=74) reported  
716 believing that mainstream media coverage of shark related issues is not factually accurate, and  
717 while the question did not specifically ask about Shark Week, many respondents brought up  
718 their concerns with sensationalist and inaccurate coverage included on Shark Week  
719 unprompted (Table 3).

720

721 *Table 3: Selected responses to the survey question “In your opinion, does the mainstream*  
722 *media accurately portray shark science and conservation issues” demonstrating survey*  
723 *respondents’ concerns about how shark science and conservation issues are portrayed in the*  
724 *media in general, and about Shark Week specifically.*

725

|                                                                                                                                          |
|------------------------------------------------------------------------------------------------------------------------------------------|
| “They hardly ever portray any scientific and/or conservation issues.”                                                                    |
| “Sharks will be portrayed as scary because that’s what sells.”                                                                           |
| “Sensationalism abounds.”                                                                                                                |
| “They sensationalize everything and do not accurately portray research.”                                                                 |
| “Media attention is mainly and predominantly focused on shark attacks which are tiny compared to worldwide deaths due to other animals.” |
| “Shark Week is a disaster.”                                                                                                              |
| “Shark Week is the worst.”                                                                                                               |

“Just look at the crap on the Discovery Channel.”

“Shark Week is the spawn of Satan.”

726

727

728 The disconnect between scientists and the producers of science-related programming may help  
729 explain the lack of support for Shark Week among a significant portion of professional shark  
730 scientists. In general, scientists report that much of what is called science on television is not  
731 science but entertainment, while producers tended to define science programming much more  
732 broadly and believe television represents science well (58). Scientists who do appear on  
733 television emphasized the particular additional skill sets required, while the broader consensus  
734 from the scientific community seems to be that scientists are “...better off doing science, but  
735 letting the broadcasters do the science stories” (58, p. 129). This, however, presents obvious  
736 challenges for programming such as Shark Week, where scientific inaccuracy is already a major  
737 source of complaint and conflict--many scientists both want to see programming improved and  
738 do not want to have to be involved in those improvements. This caution is understandable,  
739 given recent fictional programming and the reality that some scientists have reported being  
740 misled and misrepresented by Shark Week producers (29). However, it is unlikely that  
741 programming will improve without the continued participation and engagement of scientists.

742

743 *Recommendations*

744

745 The scale of Shark Week’s platform to communicate with the public about sharks means that  
746 even minor adjustments to programming could have a meaningful effect. Some of the simplest  
747 improvements involve reducing harmful sensationalism (including perceptions of the  
748 dangerousness of many activities), enhancing factual accuracy and raising editorial standards,

749 and clearly distinguishing between fact-based and fictional programming. Similarly, explicit  
750 differentiation between credentialed scientific experts and non-scientist hosts would be helpful in  
751 avoiding inadvertently legitimizing incorrect information.

752

753 In portrayals of science and scientists, it would be helpful to feature real science and more  
754 realistic scientific methods (even if recreated or dramatized), a wider range of shark species,  
755 and a more diverse range of scientists. These changes would likely help with factual accuracy  
756 while also benefiting the diversification of shark science, recruitment in STEM, and public  
757 recognition of the work of scientists from historically excluded groups.

758

759 In terms of the effects these changes might have on the public, some studies of students of  
760 varying ages have shown that increasing knowledge about animals increases positive attitudes  
761 towards those animals (83,84), including for sharks in particular (85). Television has the  
762 potential to drive conservation action or intention--for example, an increase in internet searches  
763 for conservation charities and sustainable practices were seen during and after the airing of  
764 *Blue Planet II* episodes (86,87). This does not mean that providing the public with positive  
765 representations of sharks, or accurate information about them, represents a solution to  
766 conservation problems or will necessarily generate interest or concern about them in itself (88-  
767 90). However, evidence suggests playing on existing negative stereotypes--even with an intent  
768 to challenge them--can actually serve to reinforce them (e.g., 91). Best practices for improving  
769 the public image of sharks include shifting away from negative stereotypes and providing  
770 detailed information about how conservation problems connect to people's lives and what  
771 actions they can take to help (78) .

772

773 The majority of Shark Week episodes do contain at least some educational content about  
774 sharks (often vague or brief mentions), with most episodes falling into the (broad) categories of



775 Research or Natural History (Fig 3). Even episodes focused on bites or attacks can offer some  
776 educational value when they include scientifically accurate information, though this is often  
777 undermined by conflicting messages and sensationalism, as in programs which terrorize  
778 viewers and then briefly mention shark conservation as the credits roll. While conservation  
779 content may not be appropriate for every episode, providing actionable steps for viewers is  
780 necessary in order for them to move from positive attitudes towards behavior that supports  
781 shark conservation; viewers who are misinformed or under-informed about key issues related to  
782 conservation are unlikely to support expert-backed policy solutions in useful ways (19). For  
783 example, a small number of episodes correctly connected shark fishing for meat and fins to the  
784 current population decline of sharks (3,7). However, no episodes linked these facts to specific  
785 actions the audience could take to make a difference, and only six episodes included anything  
786 arguably specific and detailed about conservation.

787

## 788 **Conclusion**

789

790 Shark Week has a complicated history over the course of its 30+ years, and has received  
791 substantial criticism for scientific inaccuracy, while also unquestionably increasing the public  
792 attention paid to sharks. This analysis attempted to quantitatively assess some of the trends and  
793 practices seen in Shark Week programming that have been anecdotally discussed for decades.

794

795 Our analyses demonstrate that the majority of episodes are not focused on shark bites,  
796 although such episodes are common and many titles and episodes are framed around fear, risk,  
797 and adrenaline. Including tangential mentions, a surprising number and diversity of shark  
798 species have been featured, although anecdotal descriptions of disproportionate attention to  
799 particular large charismatic species are supported by our data. Shark Week's depictions of  
800 research and of scientists are biased towards particular research methodologies and (mostly

801 white, mostly male) scientists, including non-scientists being presented as scientific experts  
802 even as they share incorrect information. Results suggest that as a whole, Shark Week is likely  
803 contributing to collective perceptions of sharks as monsters, and that even relatively small  
804 alterations to programming decisions could substantially improve the presentation of sharks and  
805 shark science and conservation issues.

806

807 This requires a complex balance of Shark Week's potentially competing goals to educate and  
808 entertain audiences and contribute to conservation. If Shark Week does not retain viewers, any  
809 efforts to improve programs' educational and conservation impact will not be meaningful. These  
810 competing imperatives have been recognized since at least the 1940s with radio shows such as  
811 *Great Moments in Science* and television's *The Nature of Things* (LaFollette 2008) successfully  
812 combining entertainment and accurate educational content. Successful, scientifically accurate  
813 programming featuring Don Herbert ("Mr. Wizard"), Carl Sagan, and Bill Nye, among others,  
814 succeeded because hosts displayed excellent and entertaining communication skills (92,93).  
815 Programming featuring stunning visuals and music such as *Blue Planet* and *Planet Earth*  
816 effectively entices viewers with 'visual and aural pleasure' (*sensu* 94) while also delivering  
817 accurate educational information.

818

819 Given its popularity and global viewership, Shark Week has the potential to generate interest in  
820 both sharks and scientific careers among viewers. However, Shark Week fails to feature the full  
821 range of shark research topics and methods and the diversity of people performing research on  
822 sharks. Cultivating a positive attitude toward sharks through Shark Week has the potential to  
823 drive enhanced support of shark and ocean conservation efforts. Currently, through a series of  
824 unnecessary and harmful programming choices, Shark Week can be seen as a missed  
825 opportunity to benefit sharks, shark science, and shark conservation.

826

827

828

829

830 **Acknowledgements**

831 This research was supported by funding from Allegheny College. We thank J. Carrier and R.

832 Hueter for providing personal copies of episodes for our use. We also thank R. Kajiura for

833 providing his professional independent analysis of episode titles and A. Knupsky for pointing us

834 toward the ANEW. C. Bailey and B. Davis gave invaluable advice on demographic analysis.

835 This study was inspired by conversations held in Allegheny College's 2019 FS101 course

836 "Sharks and Recreation", taught by author LBW - thank you to the Sharks and Rec students for

837 their conversations and insights.

838

839 **References**

840

841 (1) Heithaus MR, Frid A, Wirsing AJ, Worm B. Predicting ecological consequences of marine

842 top predator declines. *Trends in Ecology & Evolution* 2008;23:202-210.

843 (2) Heithaus M, Frid A, Vaudo J, Worm B, Wirsing A. Unraveling the ecological importance of

844 elasmobranchs. In: Carrier JC, Musick JA, Heithaus M, editors. *Sharks and Their Relatives II: Biodiversity, Adaptive Physiology, and Conservation*. Boca Raton, FL: CRC Press; 2010. pp.

845 611-638.

846

847 (3) Dulvy NK, Fowler SL, Musick JA, Cavanagh RD, Kyne PM, Harrison LR, et al. Extinction risk

848 and conservation of the world's sharks and rays. *eLife* 2014;3: e00590.

849 (4) Stein RW, Mull CG, Kuhn TS, Aschliman NC, Davidson LNK, Joy JB, et al. Global priorities

850 for conserving the evolutionary history of sharks, rays and chimaeras. *Nat Ecol Evol* 2018;2:

851 288-298.

852 (5) IUCN. The IUCN Red List of Threatened Species. 2021; Available at:

- 853 <https://www.iucnredlist.org/en>. Accessed Aug 6, 2021.
- 854 (6) MacNeil MA, Chapman DD, Heupel M, Simpfendorfer CA, Heithaus M, Meekan M, et al.  
855 Global status and conservation potential of reef sharks. *Nature* 2020;583: 801-806.
- 856 (7) Pacoureau N, Rigby CL, Kyne PM, Sherley RB, Winker H, Carlson JK, et al. Half a century  
857 of global decline in oceanic sharks and rays. *Nature* 2021;589: 567-571.
- 858 (8) Musick JA, Bonfil R. Management Techniques for Elasmobranch Fisheries. Food &  
859 Agriculture Org.; 2005.
- 860 (9) Jacques PJ. The social oceanography of top oceanic predators and the decline of sharks: A  
861 call for a new field. *Progress in Oceanography* 2010;86: 192-203.
- 862 (10) Ferguson K. Submerged realities: shark documentaries at depth. *Atenea* 2006;26: 115-129.
- 863 (11) O'Bryhim JR, Parsons ECM. Increased knowledge about sharks increases public concern  
864 about their conservation. *Marine Policy* 2015;56: 43-47.
- 865 (12) Glithero L, Zandvliet D. Canadian ocean literacy survey highlights. Canadian Ocean  
866 Literacy Coalition; 2020.
- 867 (13) Peschak T. Sharks and shark bite in the media. In: Nel DC, Peschak TP, editors. Finding  
868 balance: white shark conservation and recreational safety in in shore waters of Cape Town,  
869 South Africa: Proceedings of a specialist workshop: World Wildlife Fund; 2006. pp. 159-163.
- 870 (14) Muter BA, Gore ML, Gledhill KS, Lamont C, Huveneers C. Australian and U.S. news media  
871 portrayal of sharks and their conservation. *Conserv Biol* 2013;27(1):187-196.
- 872 (15) Philpott R. Why sharks may have nothing to fear more than fear itself: an analysis of the  
873 effect of human attitudes on conservation of the great white shark. *Colorado Journal of*  
874 *International Environmental Law and Policy* 2002;13: 445-472.
- 875 (16) Asen R. Imagining the public sphere. *Philosophy and Rhetoric* 2002;35: 345-367.
- 876 (17) Jarvis JL. Shark fin soup: Collective imagination in the transnational public sphere. *Global*  
877 *Media Journal, Canadian ed.* 2019;11: 49-64.
- 878 (18) Simpfendorfer CA, Heupel MR, White WT, Dulvy NK, Simpfendorfer CA, Heupel MR, et al.

- 879 The importance of research and public opinion to conservation management of sharks and rays:  
880 a synthesis. Mar Freshwater Res 2011;62: 518-527.
- 881 (19) Shiffman DS, Bittick SJ, Cashion MS, Colla SR, Coristine LE, Derrick DH, et al. Inaccurate  
882 and biased global media coverage underlies public misunderstanding of shark conservation  
883 threats and solutions. iScience 2020;23: 101205.
- 884 (20) Stone RB, Michael Bailey C, McLaughlin SA, Mace PM, Schulze MB. Federal management  
885 of US Atlantic shark fisheries. Fisheries Research 1998;39(2): 215-221.
- 886 (21) Mittermeier JC, Roll U, Matthews TJ, Grenyer R. A season for all things: Phenological  
887 imprints in Wikipedia usage and their relevance to conservation. PLOS Biology 2019;17(3):  
888 e3000146.
- 889 (22) Upwell Tide Report: Son of Sharkinar, Shark Conversation. And more sharks. Available at:  
890 <https://us5.campaign-archive.com/?u=c880da0c24096213459a64f11&id=03d6ce99cc>.  
891 Accessed Aug 6, 2021.
- 892 (23) Morfoot A. Inside the Shark Week Vs. SharkFest Battle for Cable and Streaming Viewers.  
893 2021; Available at: [https://variety.com/2021/tv/news/shark-week-vs-sharkfest-battle-cable-](https://variety.com/2021/tv/news/shark-week-vs-sharkfest-battle-cable-streaming-1235015047/)  
894 [streaming-1235015047/](https://variety.com/2021/tv/news/shark-week-vs-sharkfest-battle-cable-streaming-1235015047/). Accessed Aug 6, 2021.
- 895 (24) Eilperin J. Shark Week at 25: Discovery seeks to keep fest relevant, builds conservation  
896 ties. Washington Post 2012 -08-09.
- 897 (25) Narula SK, Lynch K. What Shark Experts Really Think About Shark Week. 2018; Available  
898 at: [https://www.outsideonline.com/culture/books-media/what-shark-experts-really-think-about-](https://www.outsideonline.com/culture/books-media/what-shark-experts-really-think-about-shark-week/)  
899 [shark-week/](https://www.outsideonline.com/culture/books-media/what-shark-experts-really-think-about-shark-week/). Accessed Aug 6, 2021.
- 900 (26) Shiffman D. Perspective | Shark scientists explain what's right and what's wrong with Shark  
901 Week. Washington Post 2018 July 24,.
- 902 (27) Dehnart A. Shark Week and Sharkfest's experts are mostly white men. Why? And does it  
903 matter? 2020; Available at: [https://www.realityblurred.com/realitytv/2020/08/shark-week-shark-](https://www.realityblurred.com/realitytv/2020/08/shark-week-shark-fest-2020-diversity/)  
904 [fest-2020-diversity/](https://www.realityblurred.com/realitytv/2020/08/shark-week-shark-fest-2020-diversity/). Accessed Aug 6, 2021.

- 905 (28) Duhaime-Ross A. How Shark Week screws scientists. 2014; Available at:  
906 <https://www.theverge.com/2014/8/13/5998745/how-shark-week-screws-scientists>. Accessed  
907 Aug 6, 2021.
- 908 (29) Shiffman D. Shark Week Lied to Scientists to Get Them to Appear in "Documentaries".  
909 2014; Available at: [https://gizmodo.com/shark-week-lied-to-scientists-to-get-them-to-appear-in-](https://gizmodo.com/shark-week-lied-to-scientists-to-get-them-to-appear-in-1619280737)  
910 [1619280737](https://gizmodo.com/shark-week-lied-to-scientists-to-get-them-to-appear-in-1619280737). Accessed Aug 6, 2021.
- 911 (30) Evans S. Shark Week and the rise of infotainment in science documentaries.  
912 *Communication Research Reports* 2015;32(3):265-271.
- 913 (31) Davidson J. Discovery Channel Provokes Outrage with Fake Shark Week Documentary.  
914 2013; Available at: [https://entertainment.time.com/2013/08/07/discovery-channel-provokes-](https://entertainment.time.com/2013/08/07/discovery-channel-provokes-outrage-with-fake-shark-week-documentary/)  
915 [outrage-with-fake-shark-week-documentary/](https://entertainment.time.com/2013/08/07/discovery-channel-provokes-outrage-with-fake-shark-week-documentary/). Accessed Aug 6, 2021.
- 916 (32) Than K. The Real Megalodon: Prehistoric Shark Behind Doc Uproar. 2013; Available at:  
917 [https://www.nationalgeographic.com/animals/article/130807-discovery-megalodon-shark-week-](https://www.nationalgeographic.com/animals/article/130807-discovery-megalodon-shark-week-great-white-sharks-animals)  
918 [great-white-sharks-animals](https://www.nationalgeographic.com/animals/article/130807-discovery-megalodon-shark-week-great-white-sharks-animals). Accessed Aug 6, 2021.
- 919 (33) Pimiento C, Clements CF. When did *Carcharocles megalodon* become extinct? A new  
920 analysis of the fossil record. *PLOS ONE* 2014;9(10) :e111086.
- 921 (34) Boessenecker RW, Ehret DJ, Long DJ, Churchill M, Martin E, Boessenecker SJ. The Early  
922 Pliocene extinction of the mega-toothed shark *Otodus megalodon*: a view from the eastern  
923 North Pacific. *PeerJ* 2019;7: e6088.
- 924 (35) Ophir Y, Jamieson KH. The effects of media narratives about failures and discoveries in  
925 science on beliefs about and support for science. *Public Underst Sci* 2021:  
926 09636625211012630.
- 927 (36) Aupers S. 'Trust no one': Modernization, paranoia and conspiracy culture. *European*  
928 *Journal of Communication* 2012;27: 22-34.
- 929 (37) Tseng Y, Tsai C, Hsieh P, Hung J, Huang T. The relationship between exposure to  
930 pseudoscientific television programmes and pseudoscientific beliefs among Taiwanese

- 931 university students. *International Journal of Science Education, Part B* 2014;4: 107-122.
- 932 (38) Tsai C, Shein PP, Jack BM, Wu K, Chou C, Wu Y, et al. Effects of exposure to  
933 pseudoscientific television programs upon Taiwanese citizens' pseudoscientific beliefs.  
934 *International Journal of Science Education, Part B* 2012;2: 175-194.
- 935 (39) Sparks GG, Nelson CL, Campbell RG. The relationship between exposure to televised  
936 messages about paranormal phenomena and paranormal beliefs. *Journal of Broadcasting &*  
937 *Electronic Media* 1997;41: 345-359.
- 938 (40) Declercq ER, Sakala C, Corry MP, Applebaum S. Listening to mothers II: Report of the  
939 second national U.S. survey of women's childbearing experiences: Conducted January-  
940 February 2006 for Childbirth Connection by Harris Interactive(R) in partnership with Lamaze  
941 International. *J Perinat Educ* 2007;16: 15-17.
- 942 (41) Morris T, McInerney K. Media representations of pregnancy and childbirth: an analysis of  
943 reality television programs in the United States. *Birth* 2010;37: 134-140.
- 944 (42) Hill A. *Reality TV*. London: Routledge; 2014.
- 945 (43) Russell CA, Russell DW, Boland WA, Grube JW. Television's cultivation of American  
946 adolescents' beliefs about alcohol and the moderating role of trait reactance. *J Child Media*  
947 2014;8: 5-22.
- 948 (44) Grimes DR. Medical disinformation and the unviable nature of COVID-19 conspiracy  
949 theories. *PLOS ONE* 2021;16: e0245900.
- 950 (45) Palmer C. *Confessions Of A Wildlife Filmmaker: A Memoir: The Challenges of Staying*  
951 *Honest in an Industry Where Ratings Are King*. Bluefield, West Virginia: Bluefield Publishing;  
952 2015.
- 953 (46) Minorities in Shark Science. Available at: <http://www.misselasma.org/>. Accessed Aug 9,  
954 2021.
- 955 (47) Hill A. *Restyling factual TV: Audiences and news, documentary and reality genres.* :  
956 London: Routledge; 2007.

- 957 (48) Barasch A. Blue Planet II Captivated Audiences Abroad. Why Didn't America Care? 2018;  
958 Available at: [https://slate.com/technology/2018/03/why-didnt-america-care-about-blue-planet-](https://slate.com/technology/2018/03/why-didnt-america-care-about-blue-planet-ii.html)  
959 [ii.html](https://slate.com/technology/2018/03/why-didnt-america-care-about-blue-planet-ii.html). Accessed Aug 12, 2021.
- 960 (49) O'Donnell K. Shark Week and Public Perceptions of Sharks. M.Sc. Thesis. Duke University;  
961 2019.
- 962 (50) Boissat L, Thomas-Walters L, Veríssimo D. Nature documentaries as catalysts for change:  
963 Mapping out the 'Blackfish Effect'. *People and Nature* 2021. doi: 10.1002/pan3.10221.
- 964 (51) Shiffman DS, Hammerschlag N. Preferred conservation policies of shark researchers.  
965 *Conservation Biology* 2016;30(4): 805-815.
- 966 (52) Bradley MM, Lang PJ. Affective norms for English words (ANEW): Instruction manual and  
967 affective ratings. The Center for Research in Psychophysiology, University of Florida 1999.
- 968 (53) Hamilton JT. Channeling Violence: The Economic Market for Violent Television  
969 Programming. Princeton: Princeton University Press; 1998.
- 970 (54) Zhang Z, Li X. Controversy is marketing: Mining sentiments in social media. 43<sup>rd</sup> Hawaii  
971 International Conference on System Sciences 2010: 1-10.
- 972 (55) Butcher PA, Colefax AP, Gorkin III RA, Kajiura SM, López NA, Mourier J, et al. The drone  
973 revolution of shark science: A review. *Drones* 2021;5: 8.
- 974 (56) Macdonald C. The Dark Side of Being a Female Shark Researcher. 2020; Available at:  
975 <https://www.scientificamerican.com/article/the-dark-side-of-being-a-female-shark-researcher/>.  
976 Accessed Aug 6, 2021.
- 977 (57) Shiffman DS, Ajemian MJ, Carrier JC, Daly-Engel TS, Davis MM, Dulvy NK, et al. Trends in  
978 chondrichthyan research: An analysis of three decades of conference abstracts. *Copeia*  
979 2020;108: 122-131.
- 980 (58) Zurawski R. How does television represent science? M.A. Thesis. Mount Saint Vincent  
981 University; 2010.
- 982 (59) Howell L, Singer JB. Pushy or a princess? Women experts and British broadcast news.



- 983 Journalism Practice 2017;11: 1062-1078.
- 984 (60) Manne K. Down Girl: The Logic of Misogyny. Oxford: Oxford University Press; 2017.
- 985 (61) Rudman LA, Moss-Racusin CA, Phelan JE, Nauts S. Status incongruity and backlash  
986 effects: Defending the gender hierarchy motivates prejudice against female leaders. Journal of  
987 Experimental Social Psychology 2012;48: 165-179.
- 988 (62) Holderman LB. Media-constructed anti-intellectualism: The portrayal of experts in popular  
989 US television talk shows. New Jersey Journal of Communication 2003;11: 45-62.
- 990 (63) Landivar LC. Disparities in STEM employment by sex, race, and Hispanic origin. United  
991 States Census Bureau 2013 September.
- 992 (64) Clancy KBH, Nelson RG, Rutherford JN, Hinde K. Survey of Academic Field Experiences  
993 (SAFE): Trainees report harassment and assault. PLOS ONE 2014; 9:e102172.
- 994 (65) St. John K, Riggs E, Mogk D. Sexual harassment in the sciences: A call to geoscience  
995 faculty and researchers to respond. Journal of Geoscience Education 2016;64: 255-257.
- 996 (66) Good JJ, Woodzicka JA, Wingfield LC. The effects of gender stereotypic and counter-  
997 stereotypic textbook images on science performance. Journal of Social Psychology 2010;150:  
998 132-147.
- 999 (67) O'Brien LT, Hitti A, Shaffer E, Camp ARV, Henry D, Gilbert PN. Improving girls' sense of fit  
1000 in science: Increasing the impact of role models. Social Psychological and Personality Science  
1001 2017;8: 301-309.
- 1002 (68) Van Camp AR, Gilbert PN, O'Brien LT. Testing the effects of a role model intervention on  
1003 women's STEM outcomes. Social Psychology of Education 2019;22: 649-671.
- 1004 (69) Steele JE. Experts and the operational bias of television news: The case of the Persian  
1005 Gulf War. Journalism & Mass Communication Quarterly 1995;72: 799-812.
- 1006 (70) McPherson M, Smith-Lovin L, Cook JM. Birds of a feather: Homophily in Social Networks.  
1007 Annu Rev Sociol 2001;27: 415-444.
- 1008 (71) Alfred SR, Lambert Jr. JT. Systemic practice and action research. Systemic Practice and

- 1009 Action Research 2012;25: 323-354.
- 1010 (72) 2010 Census of Population and Housing. Commonwealth of the Bahamas 2012.
- 1011 (73) Lehohla P. Census 2011: Census in brief. Statistics South Africa 2012.
- 1012 (74) Neff C, Hueter R. Science, policy, and the public discourse of shark “attack”: a proposal for  
1013 reclassifying human–shark interactions. *Journal of Environmental Studies and Sciences* 2013;3:  
1014 65-73.
- 1015 (75) Kleiven J, Bjerke T, Kaltenborn BP. Factors influencing the social acceptability of large  
1016 carnivore behaviours. *Biodiversity and Conservation* 2004:1647-1658.
- 1017 (76) Myrick JG, Evans SD. Do PSAs take a bite out of Shark Week? The effects of juxtaposing  
1018 environmental messages with violent images of shark attacks. *Science Communication*  
1019 2014;36: 544-569.
- 1020 (77) Pepin-Neff C, Wynter T. Shark bites and shark conservation: An analysis of human  
1021 attitudes following shark bite incidents in two locations in Australia. *Conservation Letters*  
1022 2018;11(2): e12407.
- 1023 (78) Panoch R, Pearson EL. Humans and sharks: Changing public perceptions and Overcoming  
1024 fear to facilitate shark conservation. *Society and Animals* 2017;25: 57–76.
- 1025 (79) Viale PH. Celebrities and medicine: A potent combination. *J Adv Pract Oncol* 2014;5: 82-  
1026 84.
- 1027 (80) Duthie E, Verissimo D, Keane A, Knight AT. The effectiveness of celebrities in conservation  
1028 marketing. *PLOS ONE* 2017 Jul 7,;12(7):e0180027.
- 1029 (81) Shiffman D. Shark Riders Pose Threat to Conservation Gains Made with Diving  
1030 Ecotourism. 2014; Available at: [https://www.scientificamerican.com/article/shark-riders-pose-  
1031 threat-to-conservation-gains-made-with-diving-ecotourism-slide-show1/](https://www.scientificamerican.com/article/shark-riders-pose-threat-to-conservation-gains-made-with-diving-ecotourism-slide-show1/). Accessed Aug 12,  
1032 2021.
- 1033 (82) Ford AT, Ali AH, Colla SR, Cooke SJ, Lamb CT, Pittman J, et al. Understanding and  
1034 avoiding misplaced efforts in conservation. *Facets* 2021;6:252-271.

- 1035 (83) Barney EC, Mintzes JJ, Yen C. Assessing knowledge, attitudes, and behavior toward  
1036 charismatic megafauna: The case of dolphins. *The Journal of Environmental Education*  
1037 2005;36: 41-55.
- 1038 (84) Prokop P, Tunnicliffe SD. “Disgusting” animals: Primary school children’s attitudes and  
1039 myths of bats and spiders. *Eurasia Journal of Mathematics, Science and Technology Education*  
1040 2008;4: 87-97.
- 1041 (85) Thompson TL, Mintzes JJ. Cognitive structure and the affective domain: On knowing and  
1042 feeling in biology. *International Journal of Science Education* 2002;24: 645-660.
- 1043 (86) Hayns-Worthington S. The Attenborough effect: Searches for plastic recycling rocket after  
1044 Blue Planet II. 2018; Available at: [https://resource.co/article/attenborough-effect-searches-](https://resource.co/article/attenborough-effect-searches-plastic-recycling-rocket-after-blue-planet-ii-12334)  
1045 [plastic-recycling-rocket-after-blue-planet-ii-12334](https://resource.co/article/attenborough-effect-searches-plastic-recycling-rocket-after-blue-planet-ii-12334). Accessed Aug 6, 2021.
- 1046 (87) Hynes S, Ankamah-Yeboah I, O’Neill S, Needham K, Xuan BB, Armstrong C. The impact of  
1047 nature documentaries on public environmental preferences and willingness to pay: entropy  
1048 balancing and the Blue Planet II effect. *Journal of Environmental Planning and Management*  
1049 2021;64: 1428-1456.
- 1050 (88) Braun T, Cottrell R, Dierkes P. Fostering changes in attitude, knowledge and behavior:  
1051 demographic variation in environmental education effects. *Environmental Education Research*  
1052 2018;24: 899-920.
- 1053 (89) Kollmuss A, Agyeman J. Mind the Gap: Why do people act environmentally and what are  
1054 the barriers to pro-environmental behavior? *Environmental Education Research* 2002;8: 239-  
1055 260.
- 1056 (90) Jones JPG, Thomas-Walters L, Rust NA, Verissimo D. Nature documentaries and saving  
1057 nature: Reflections on the new Netflix series *Our Planet*. *People and Nature* 2019;1: 420-425.
- 1058 (91) Weaver R, Ferguson C, Wilbourn M, Salamonson Y. Men in nursing on television: exposing  
1059 and reinforcing stereotypes. *J Adv Nurs* 2014;70: 833-842.
- 1060 (92) Chotkowski Lafollette M. Science on the Air: Popularizers and personalities on radio and

- 1061 early television. Chicago: University of Chicago Press; 2008.
- 1062 (93) Scott E. Science communication: Science fresh from the box. *Nature* 2012;492: 184-185.
- 1063 (94) Wheatley H. The limits of television?: Natural history programming and the transformation  
1064 of public service broadcasting. *European Journal of Cultural Studies* 2004;7: 325-339.
- 1065
- 1066 **Supporting information**
- 1067 S1. Shark Week episodes by year. Blue column indicates whether the episode was included in  
1068 the content analysis. Yellow columns indicate titles deemed negative using the ANEW, using  
1069 context, and with the ANEW and context combined.
- 1070 S2. Coding guidelines for the content analysis of Shark Week episodes.
- 1071 S3. Chondrichthyan species featured in Shark Week episodes and number of episodes.

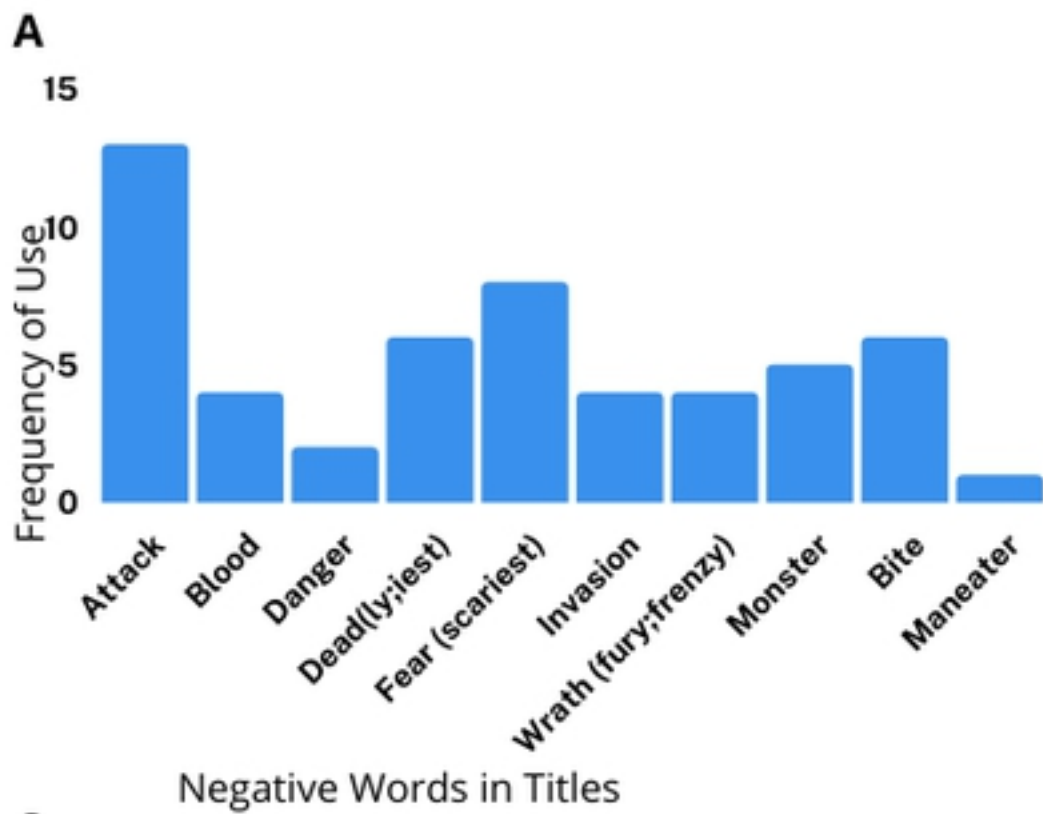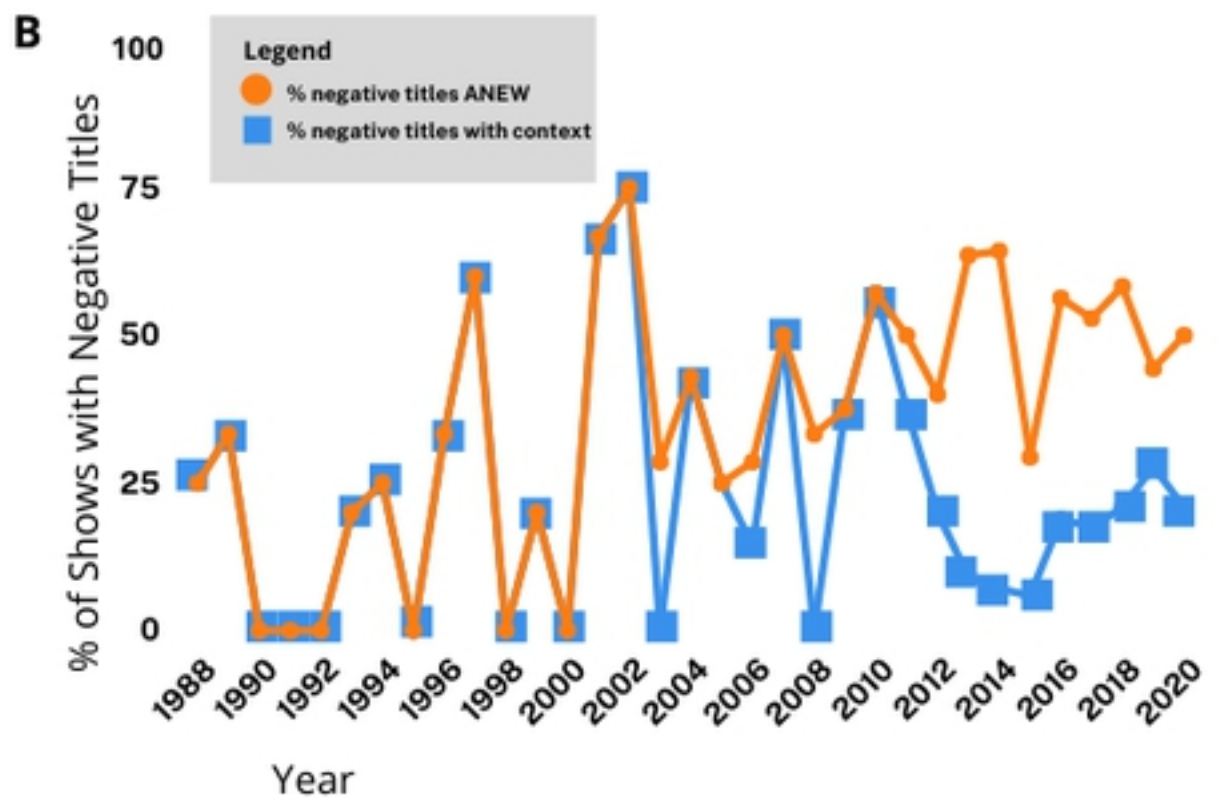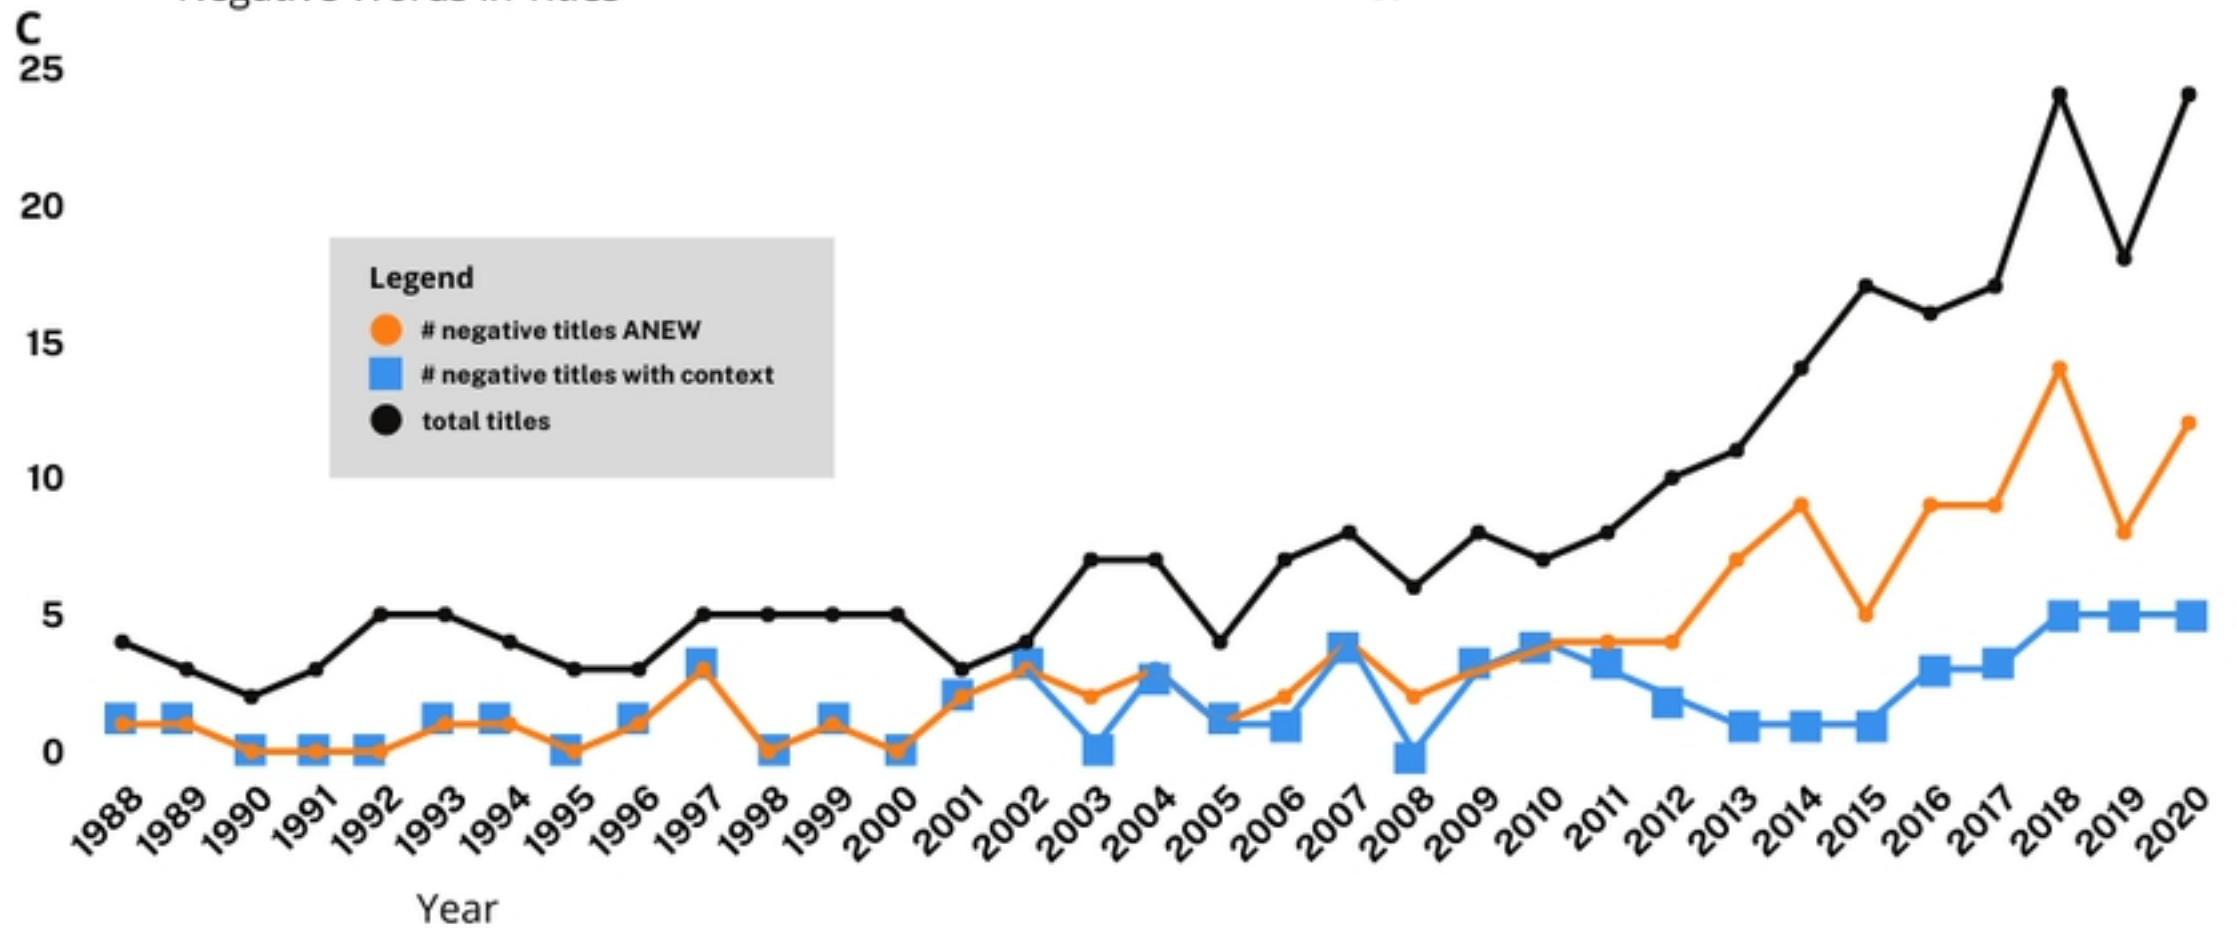

Figure 1

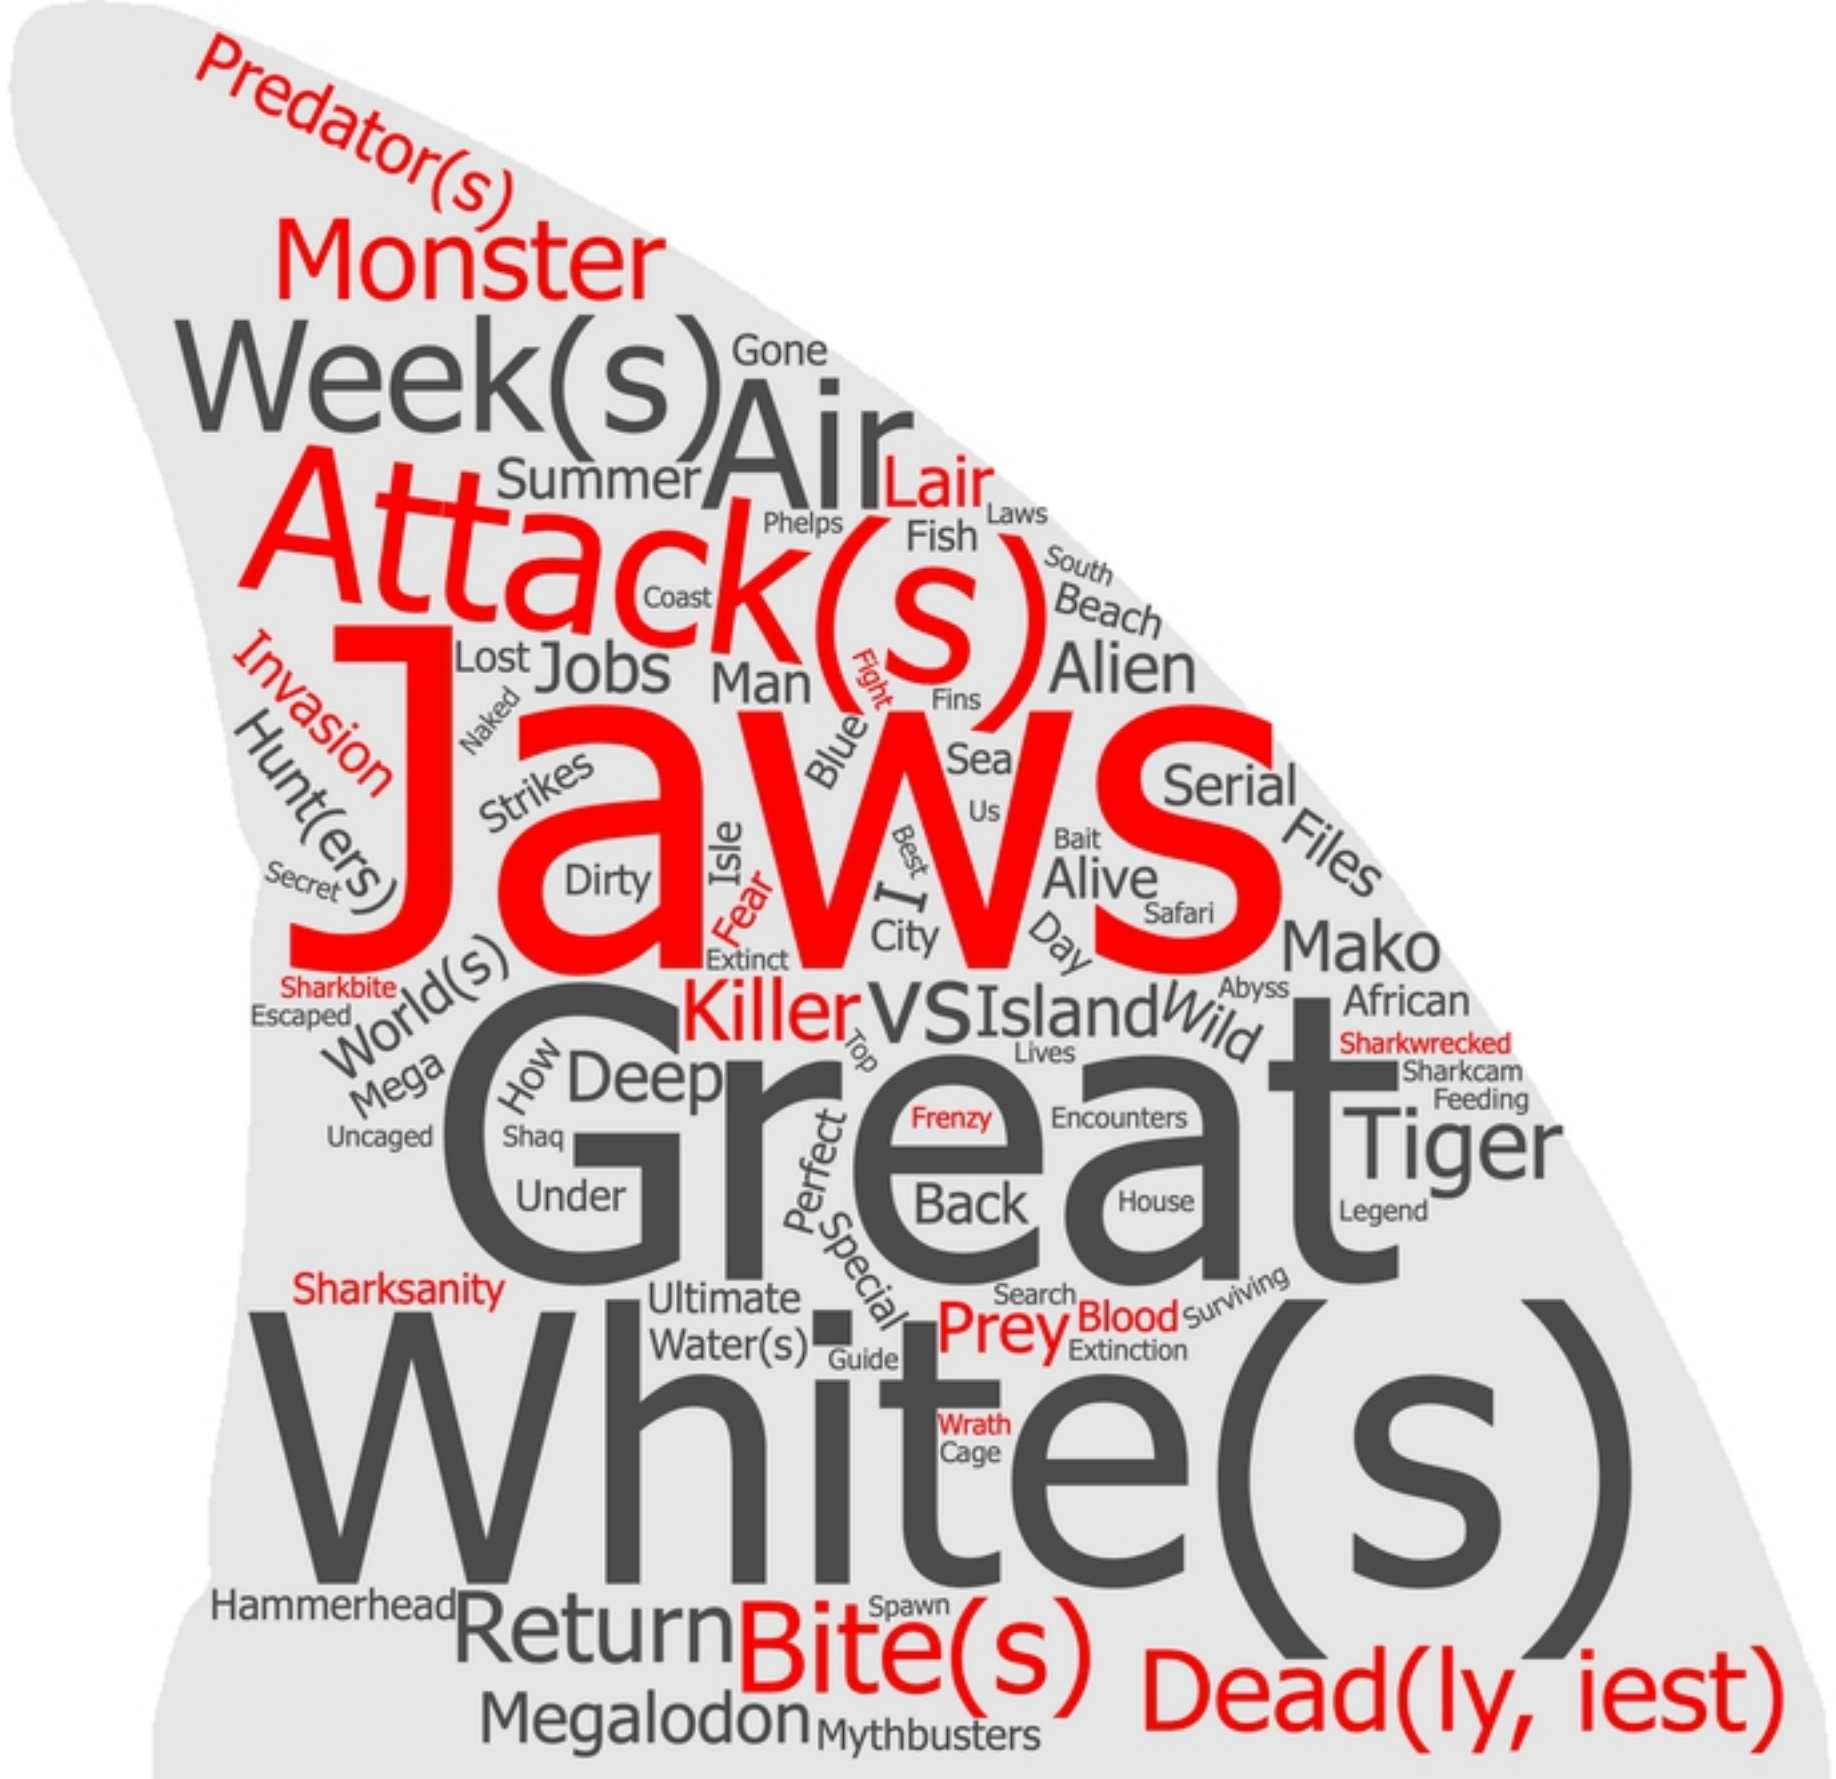

Figure 2

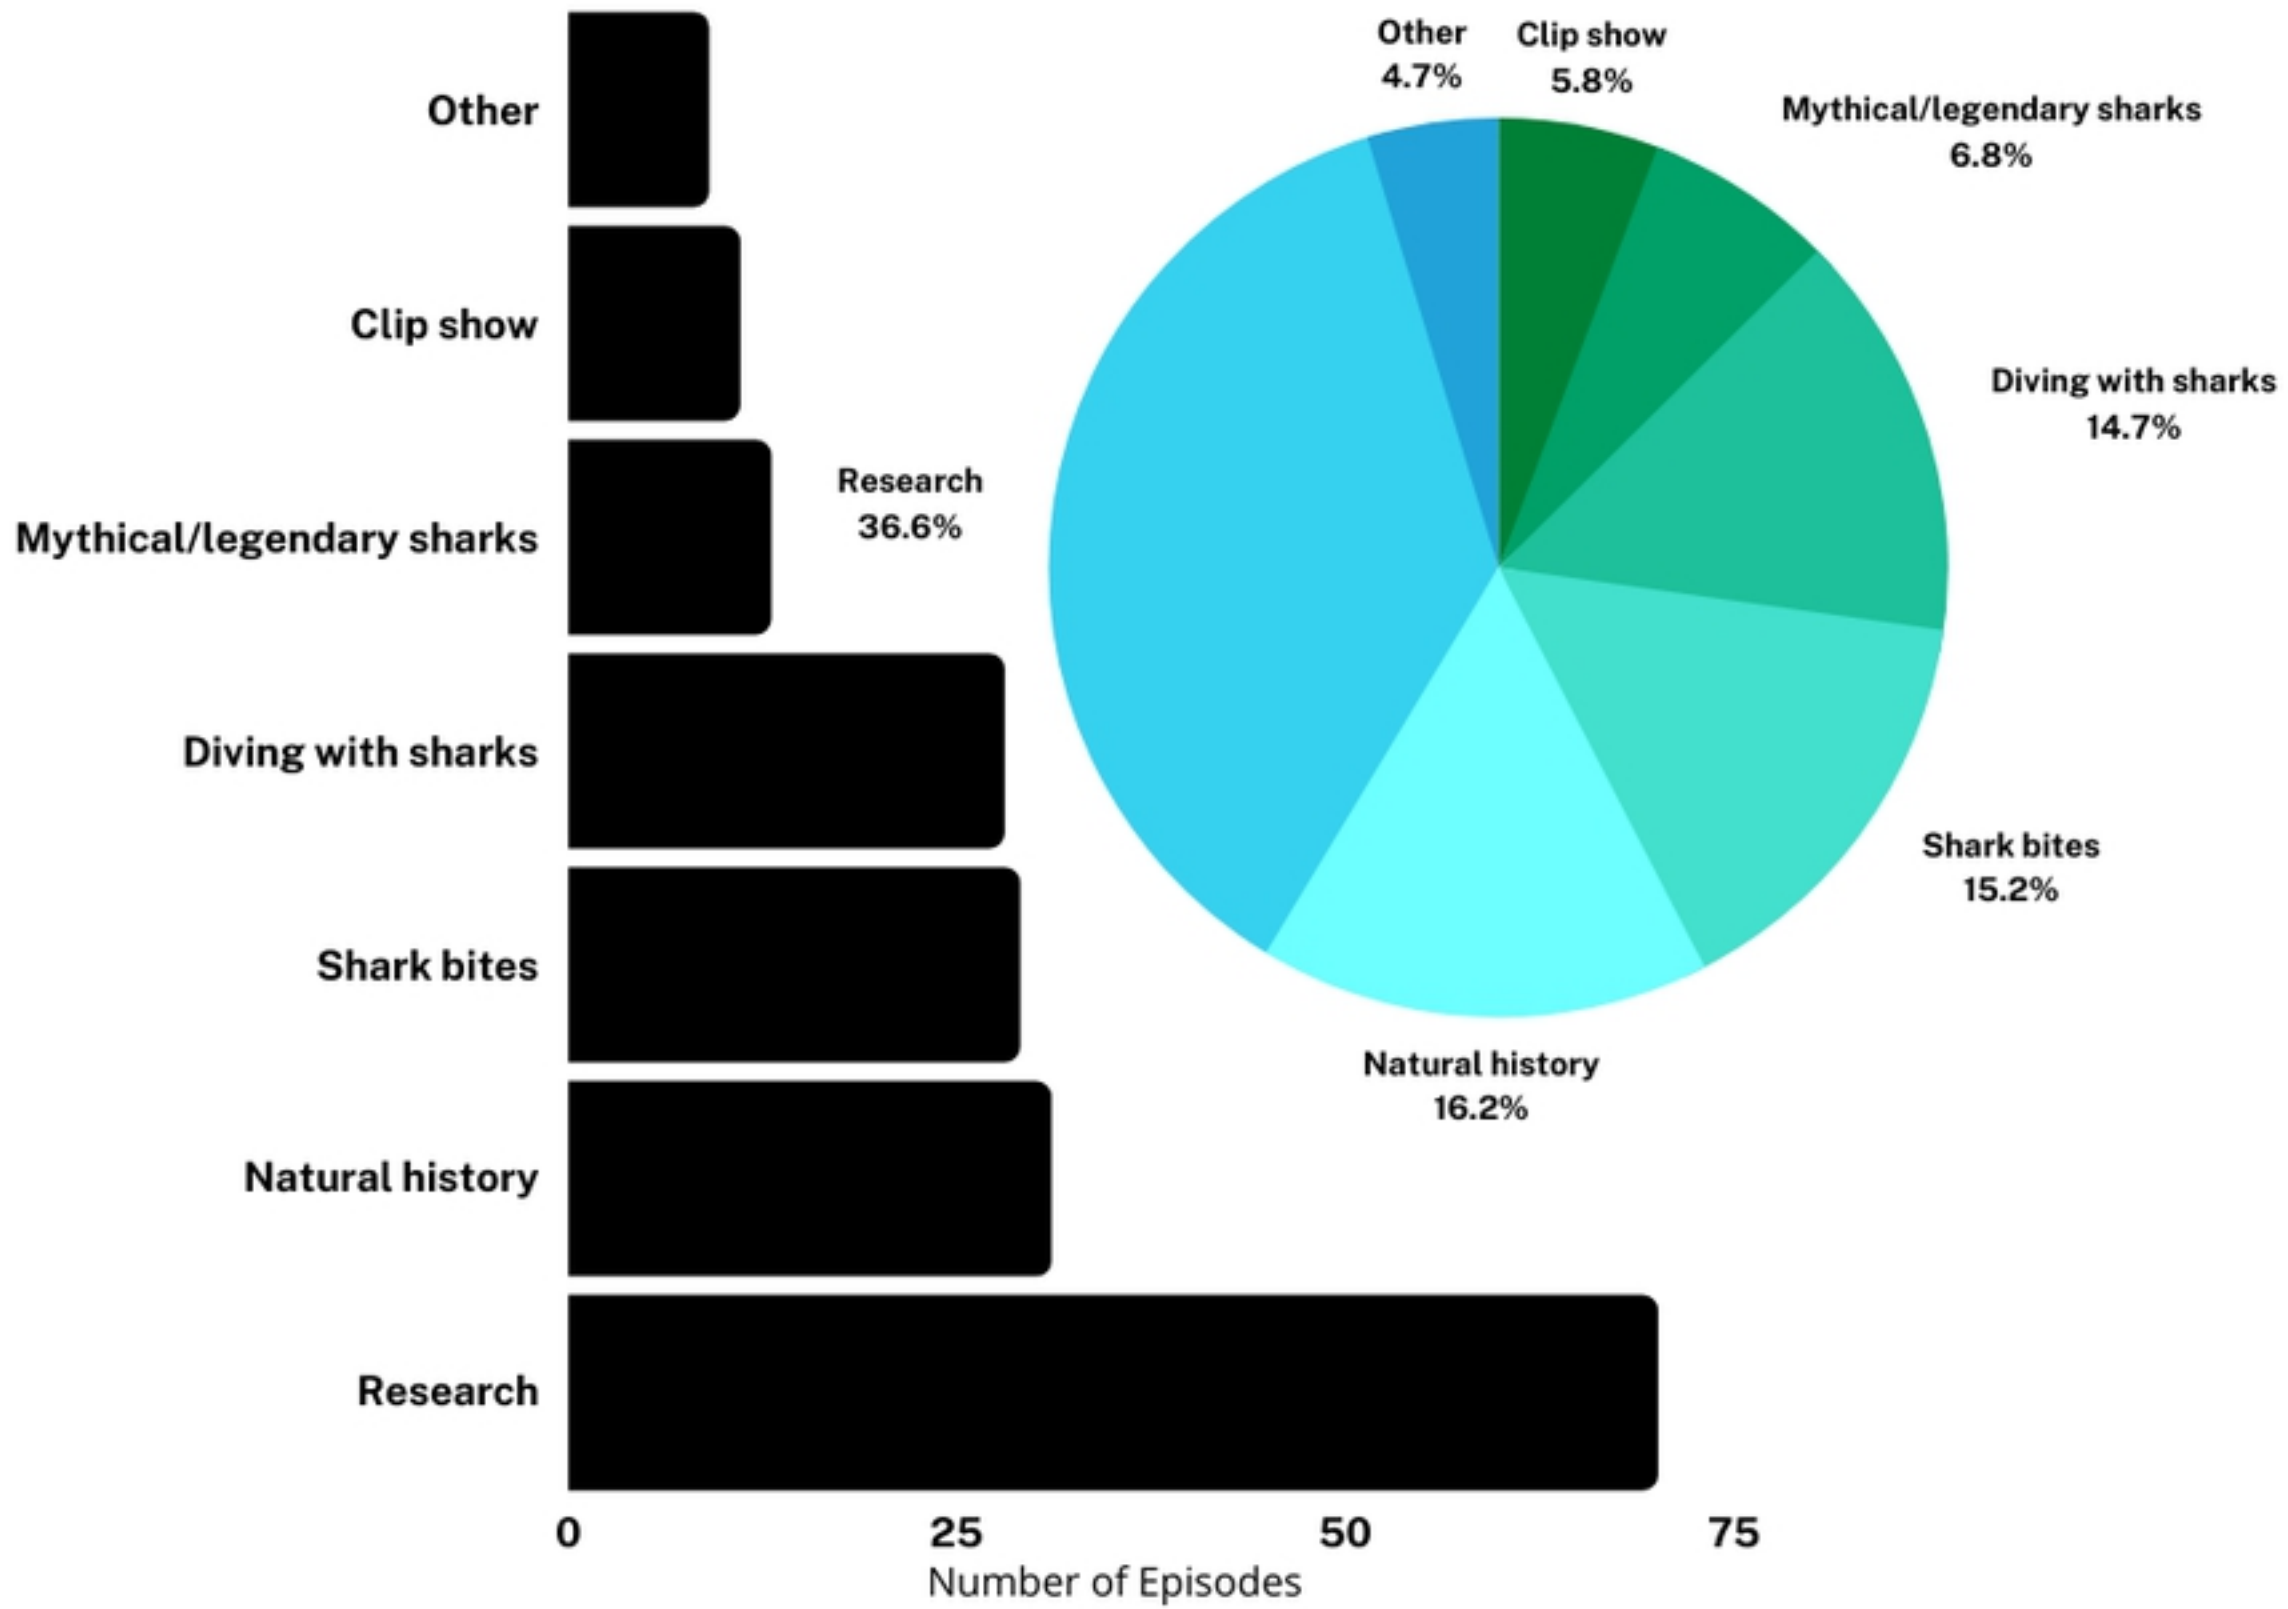

Figure 3

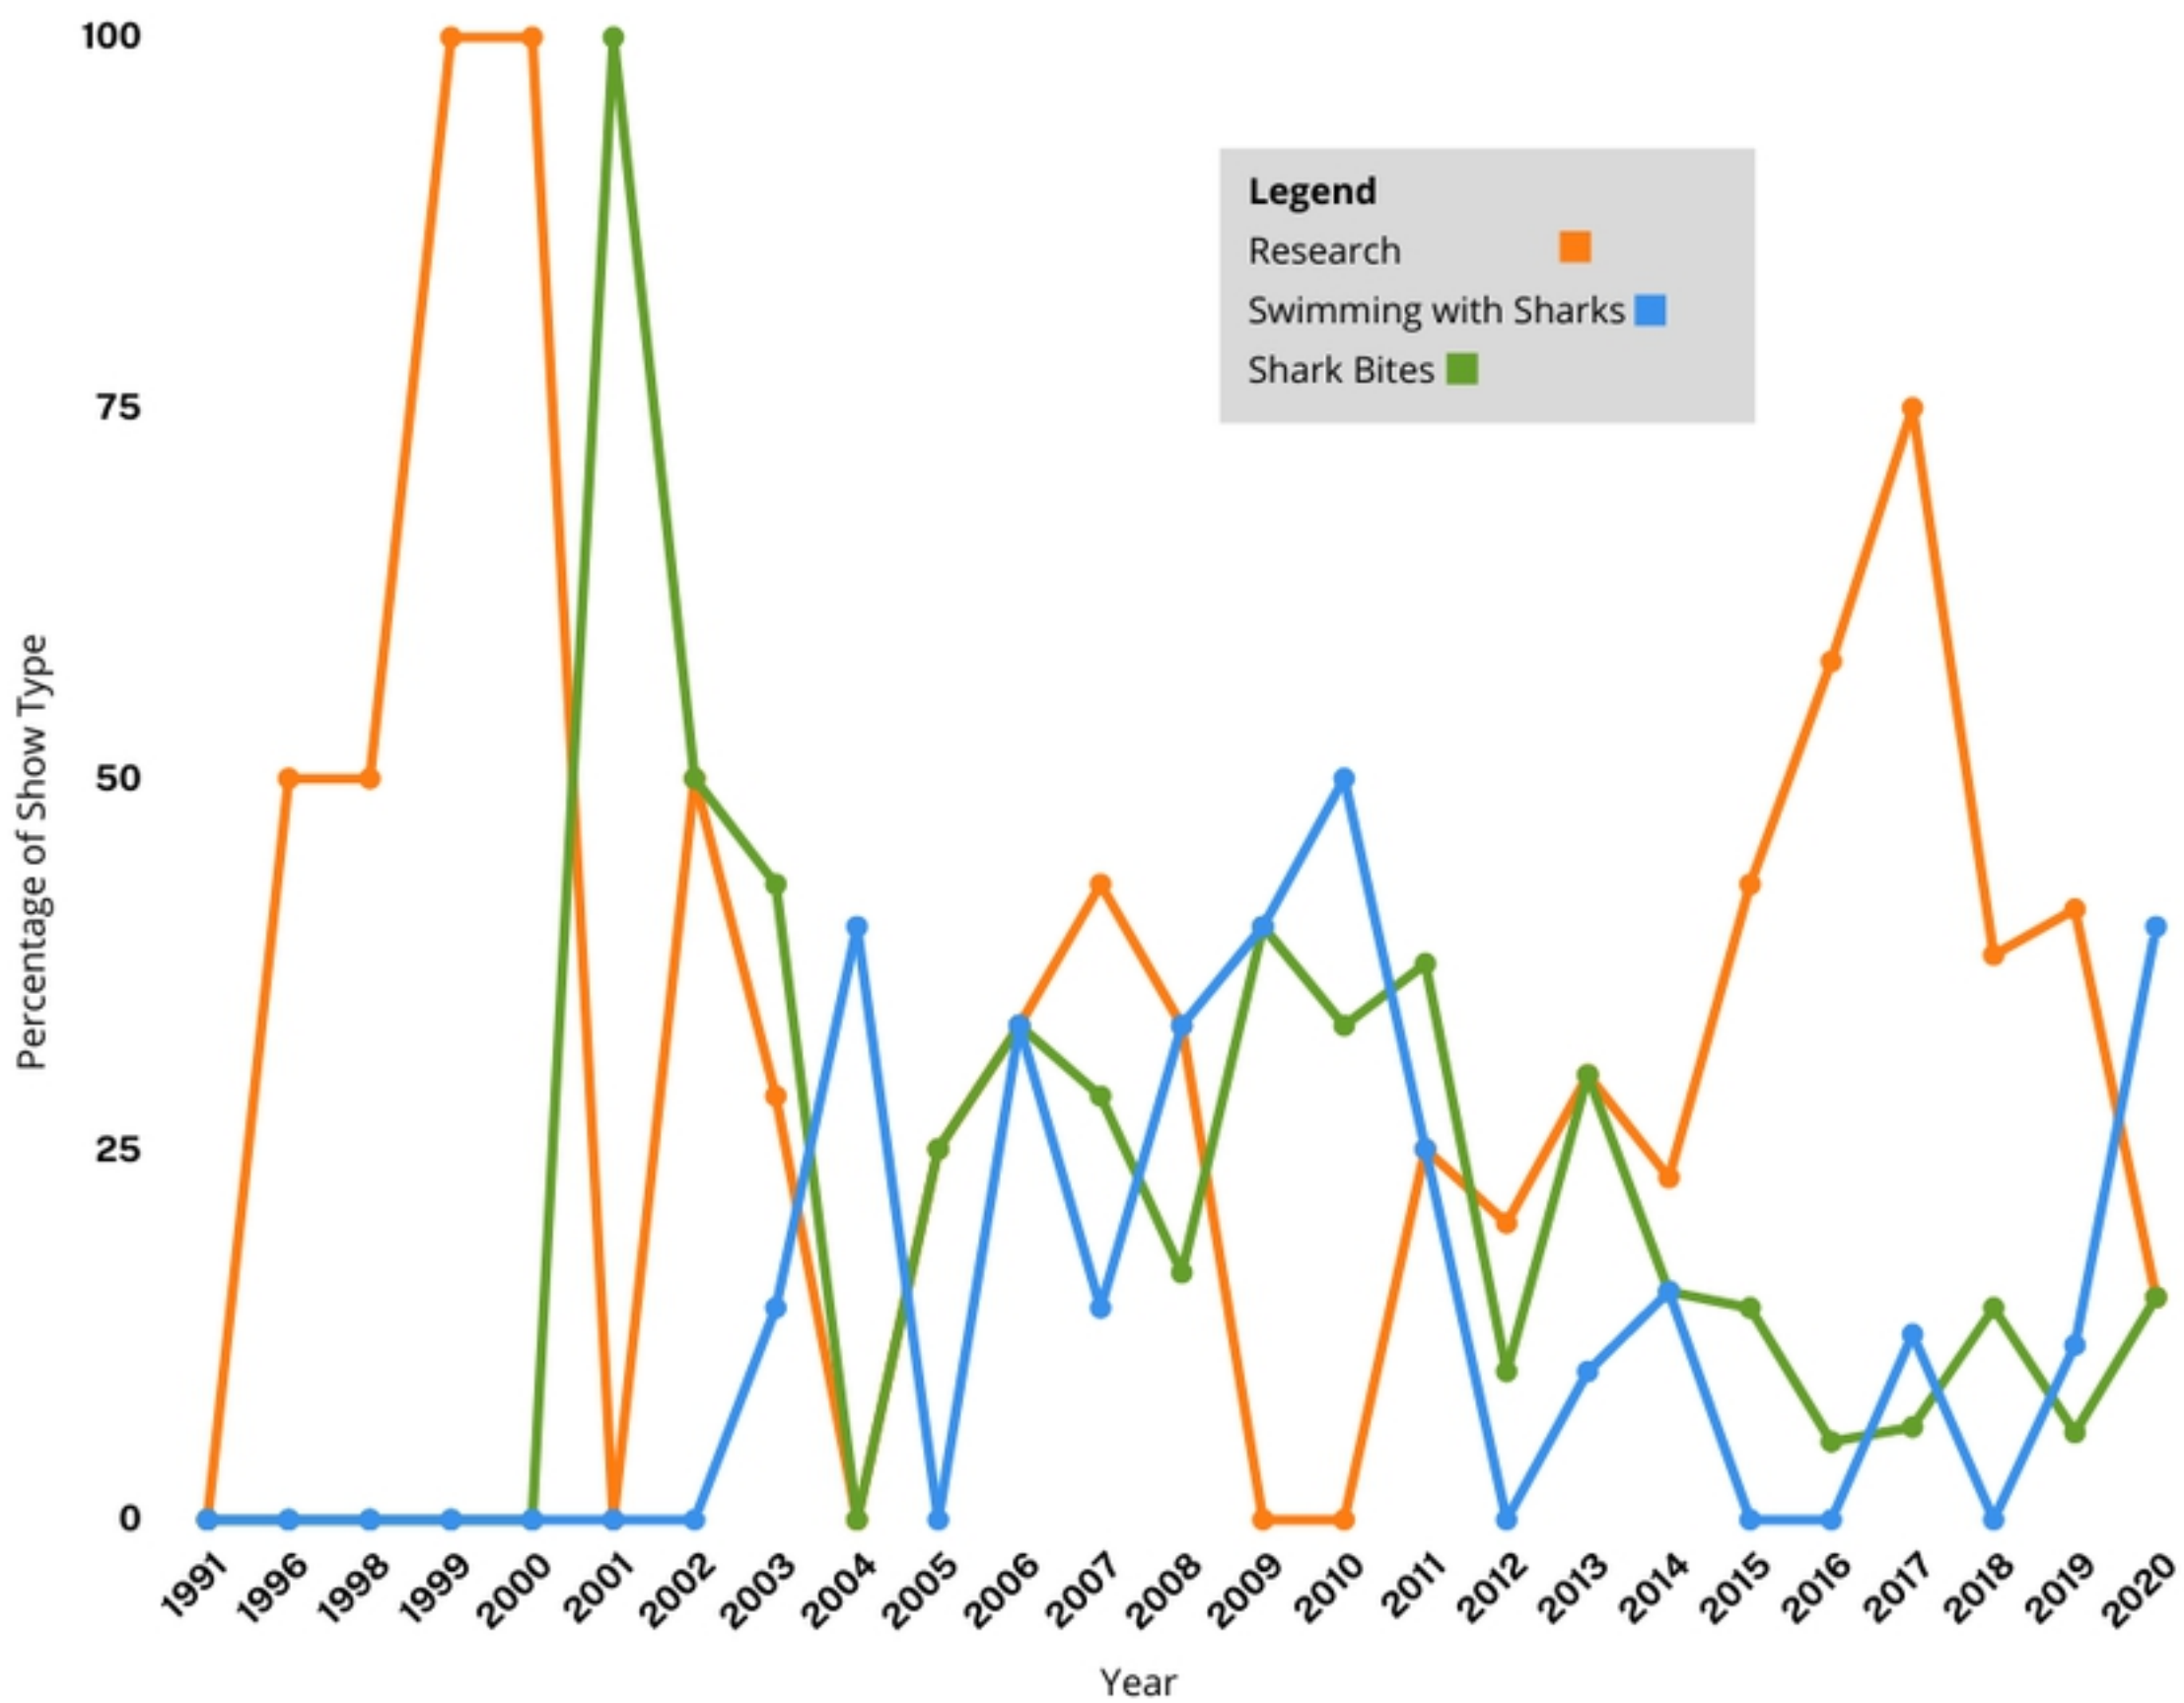

Figure 4



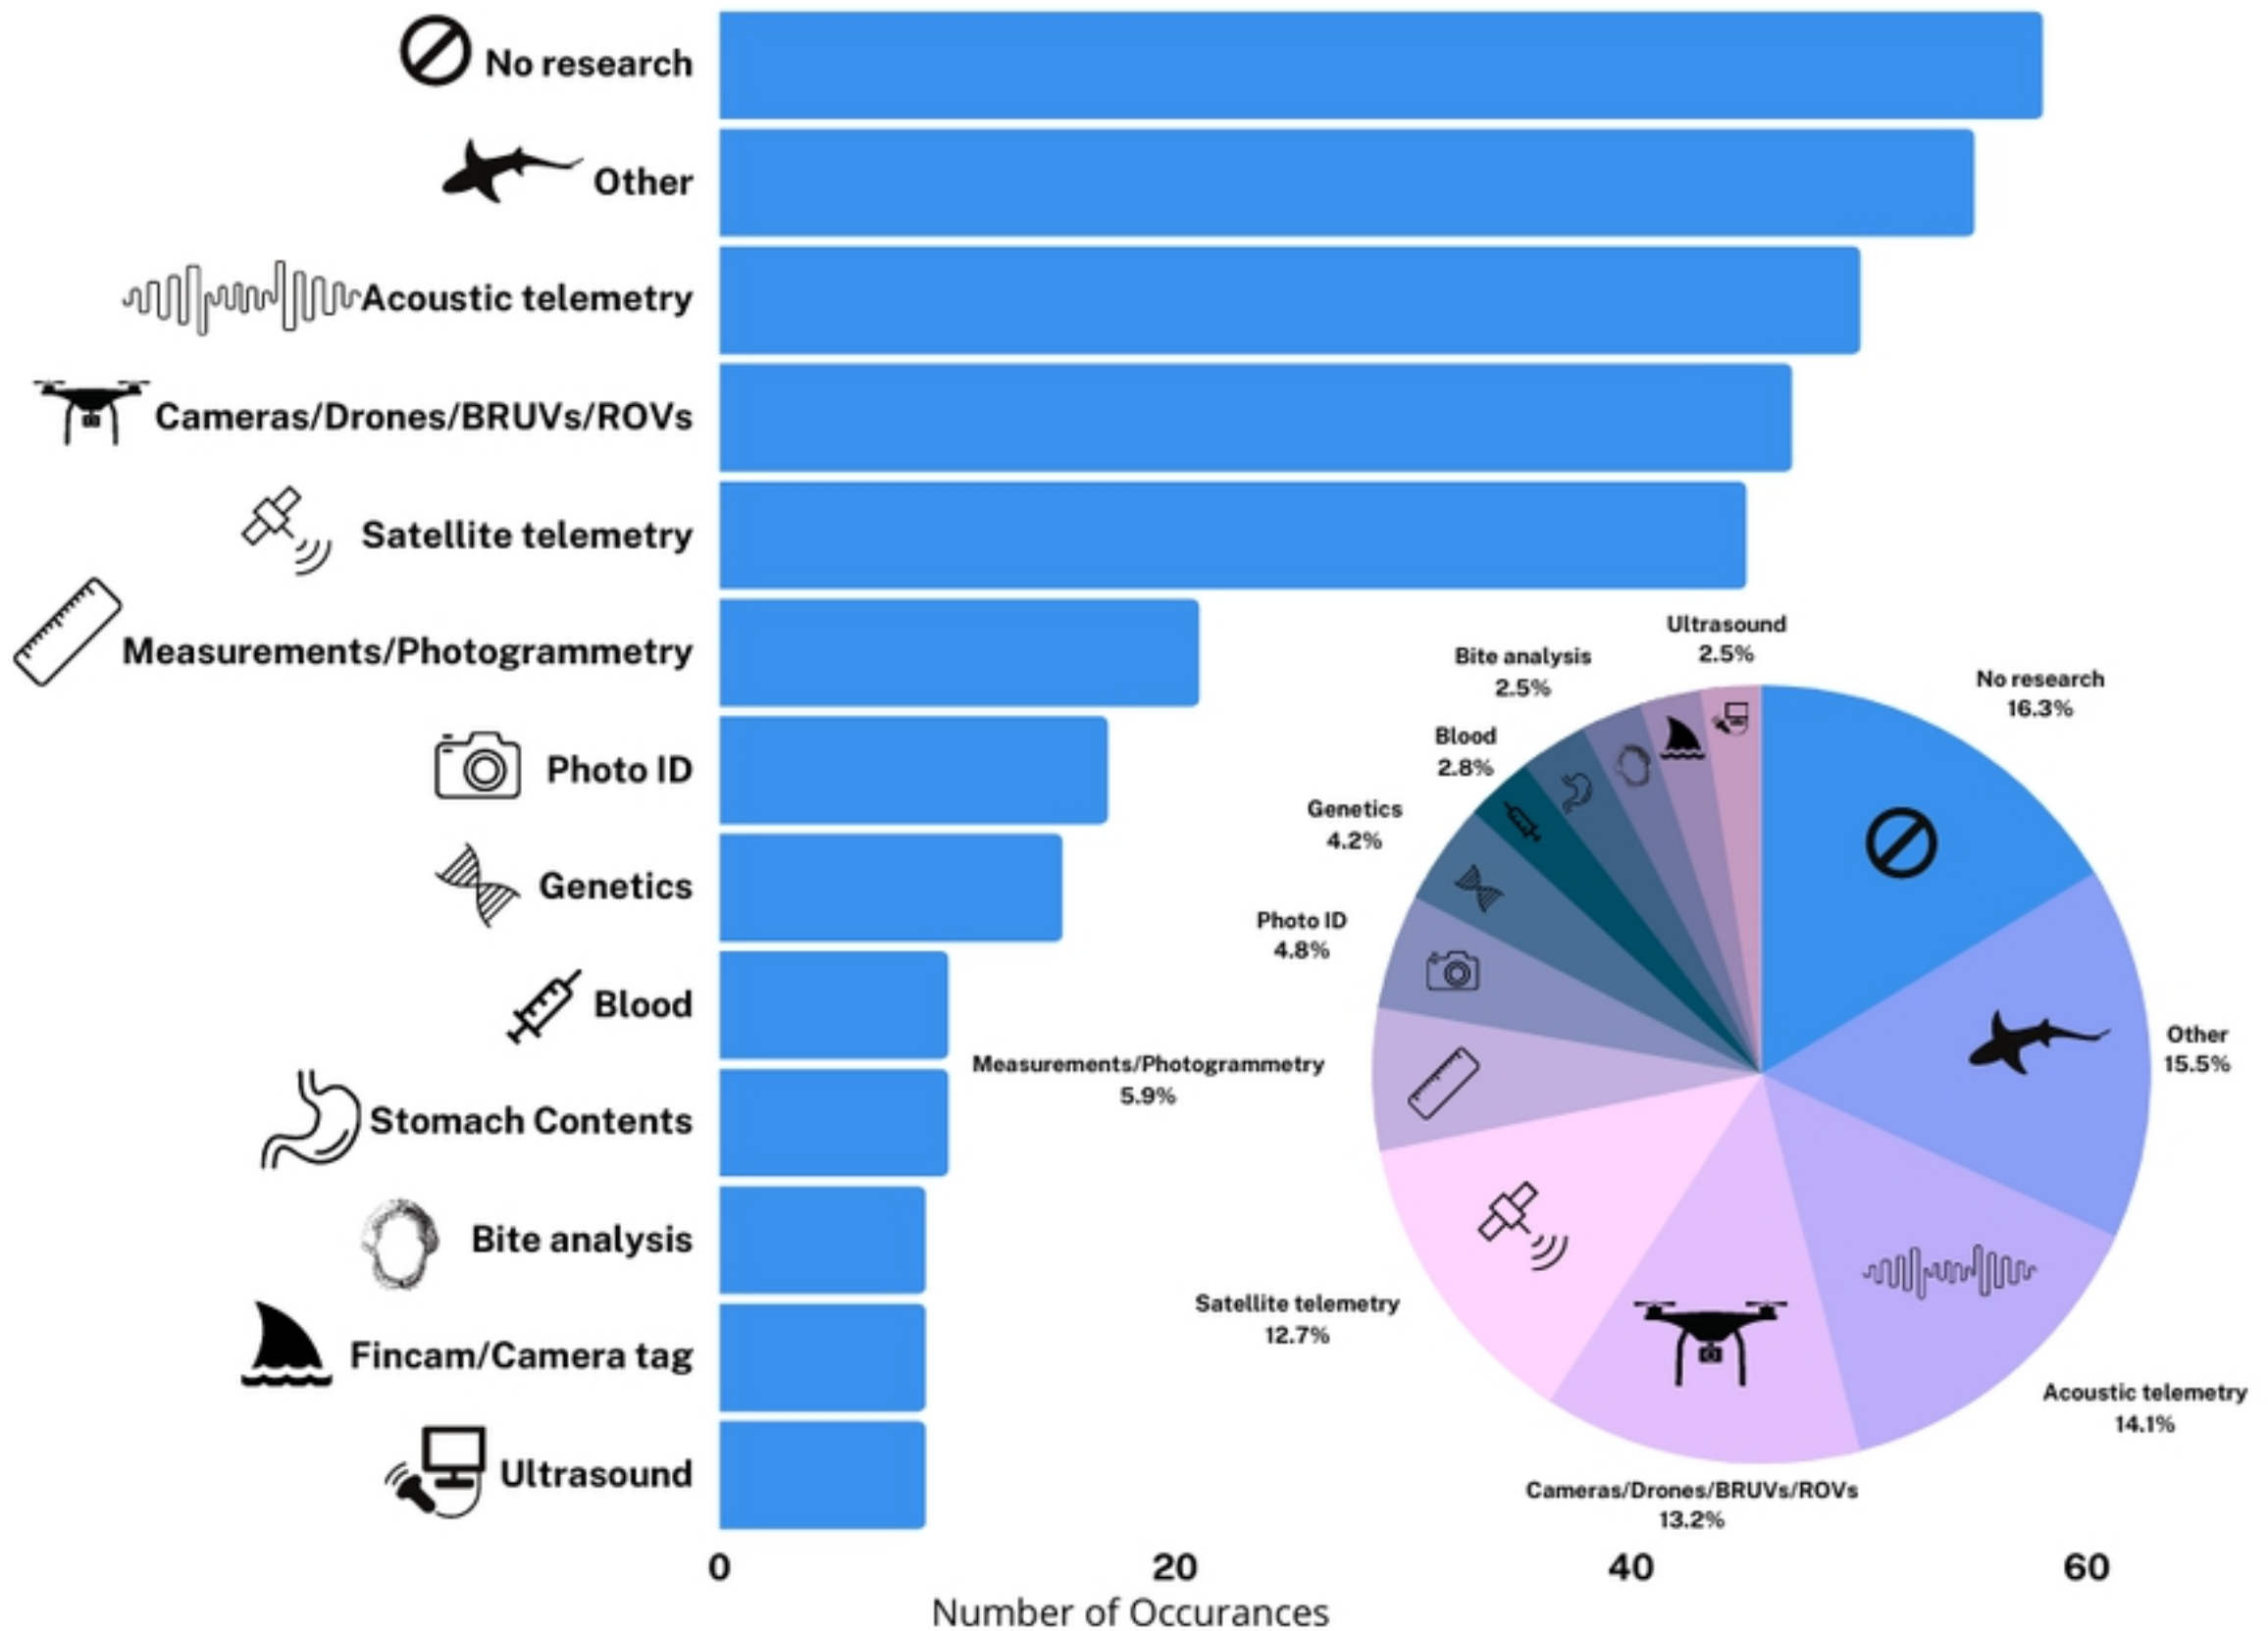

Figure 5

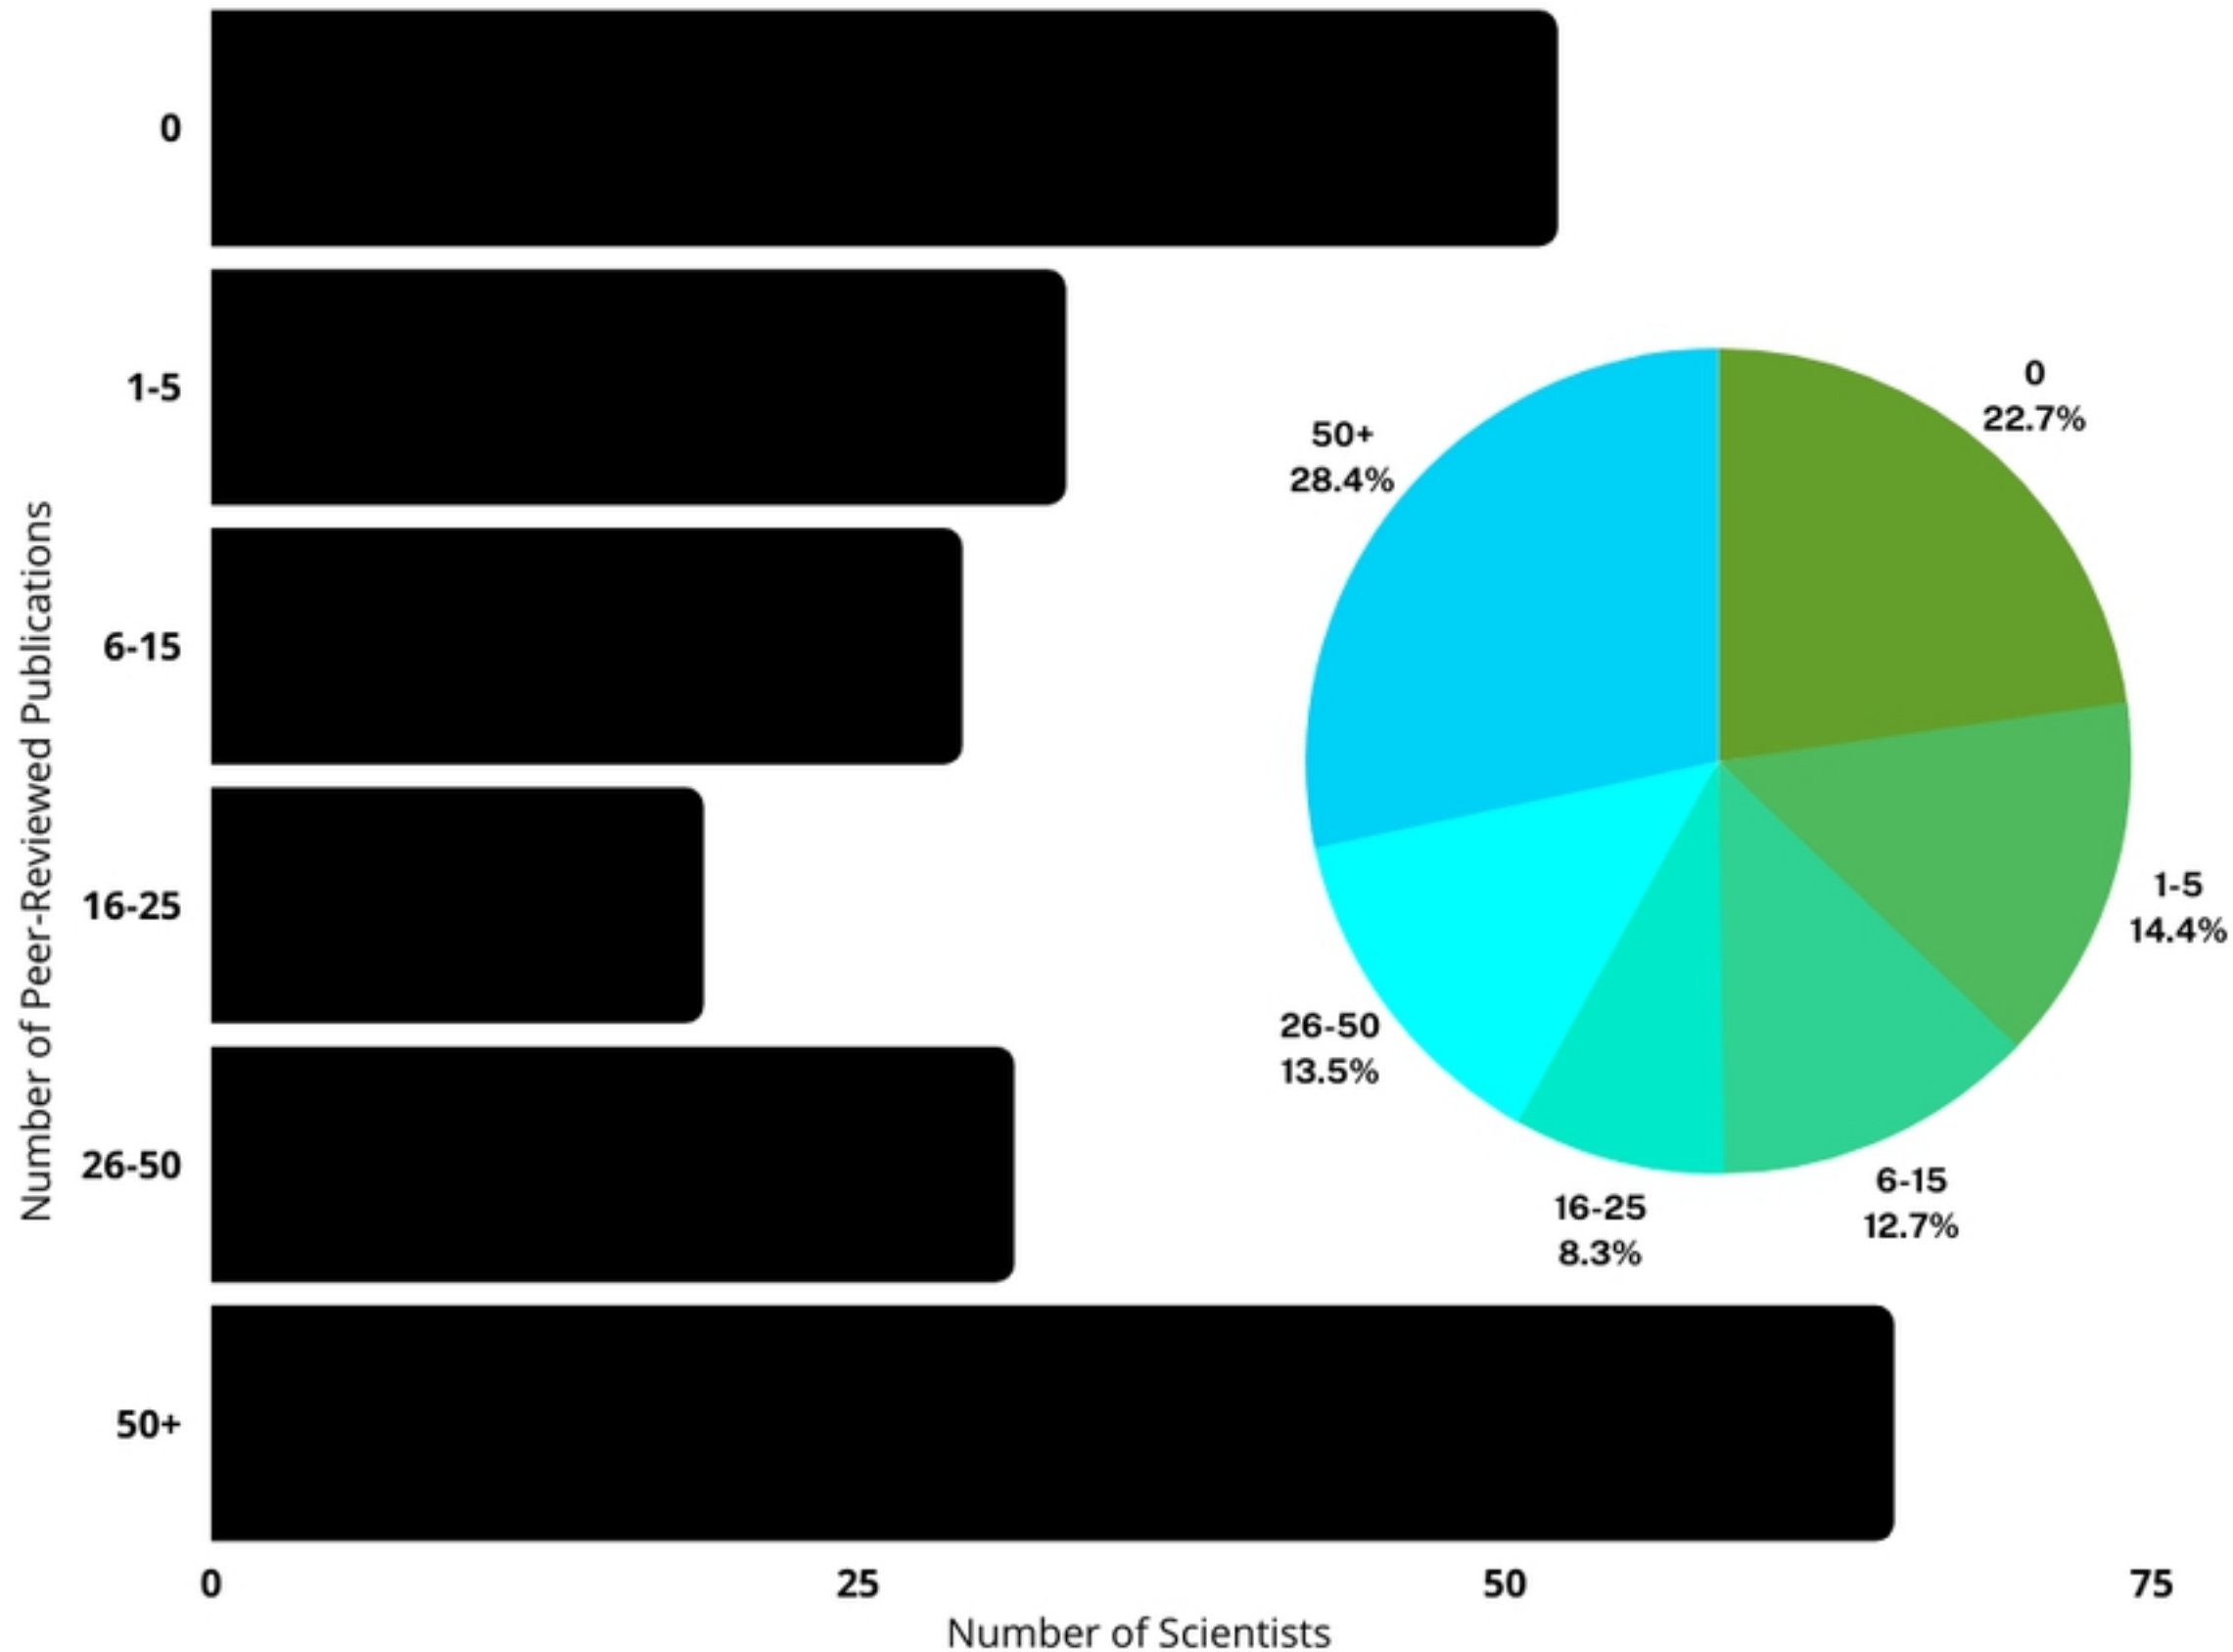

Figure 6

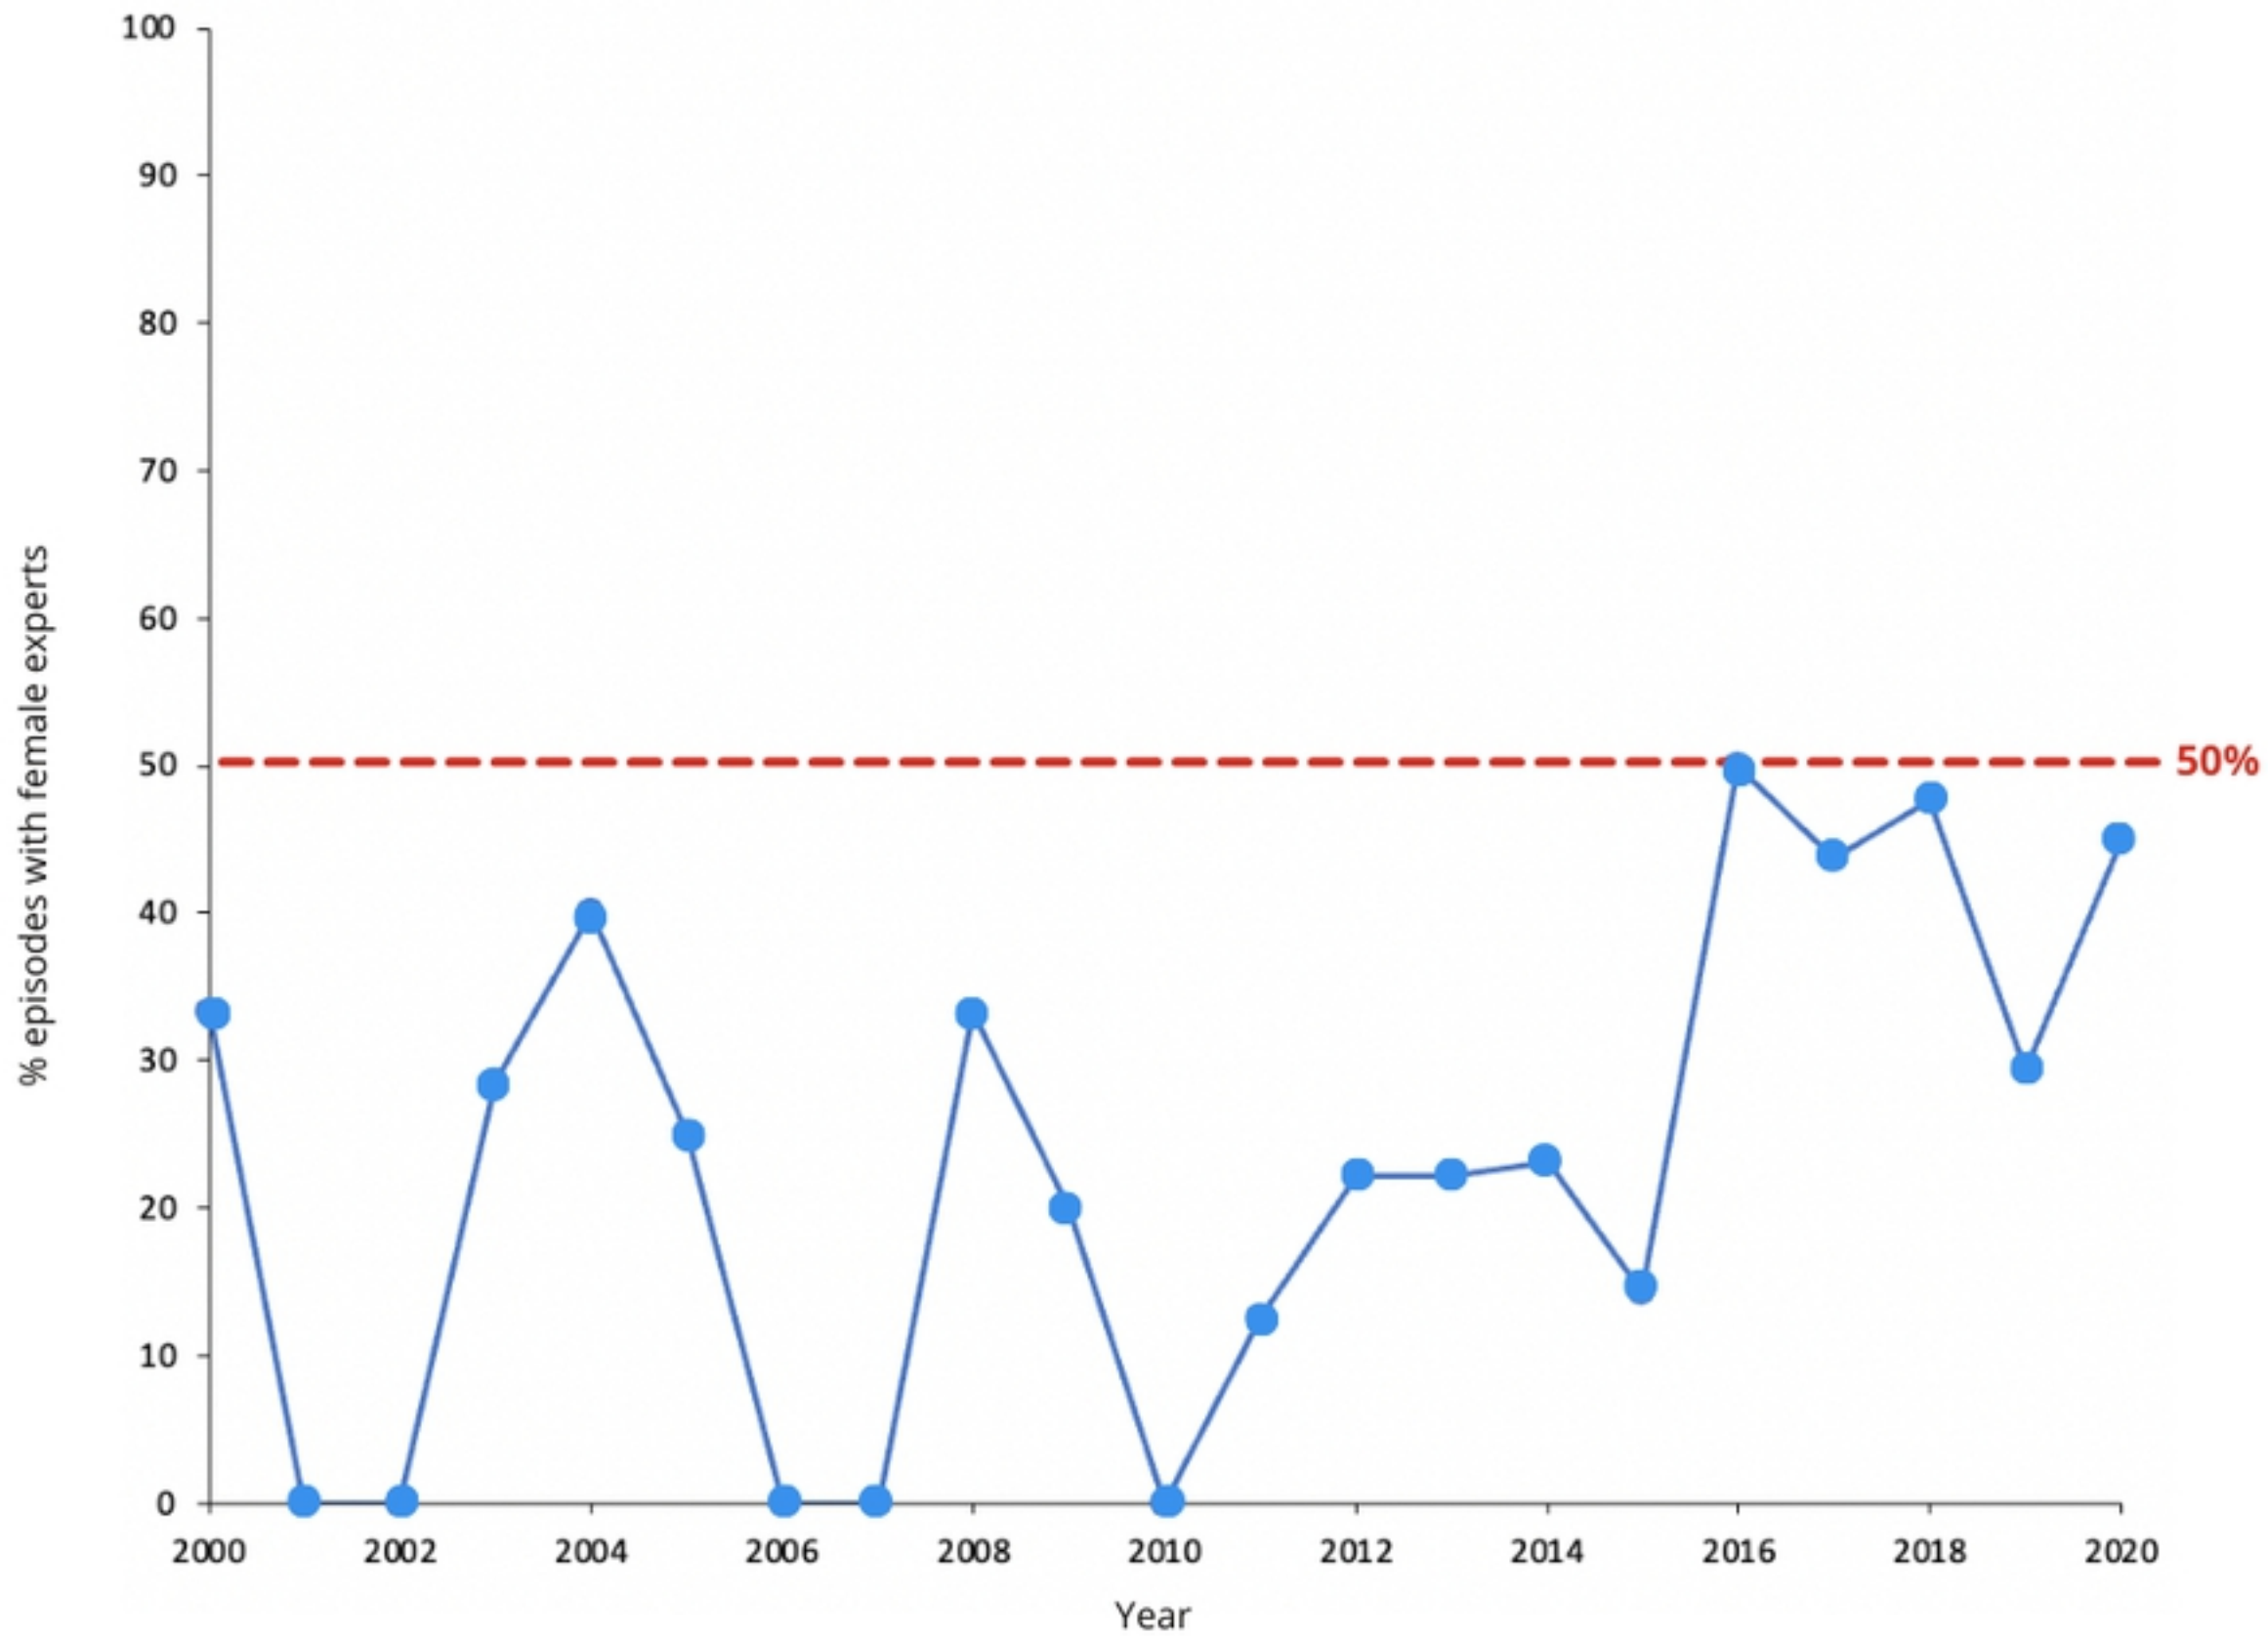

Figure 7

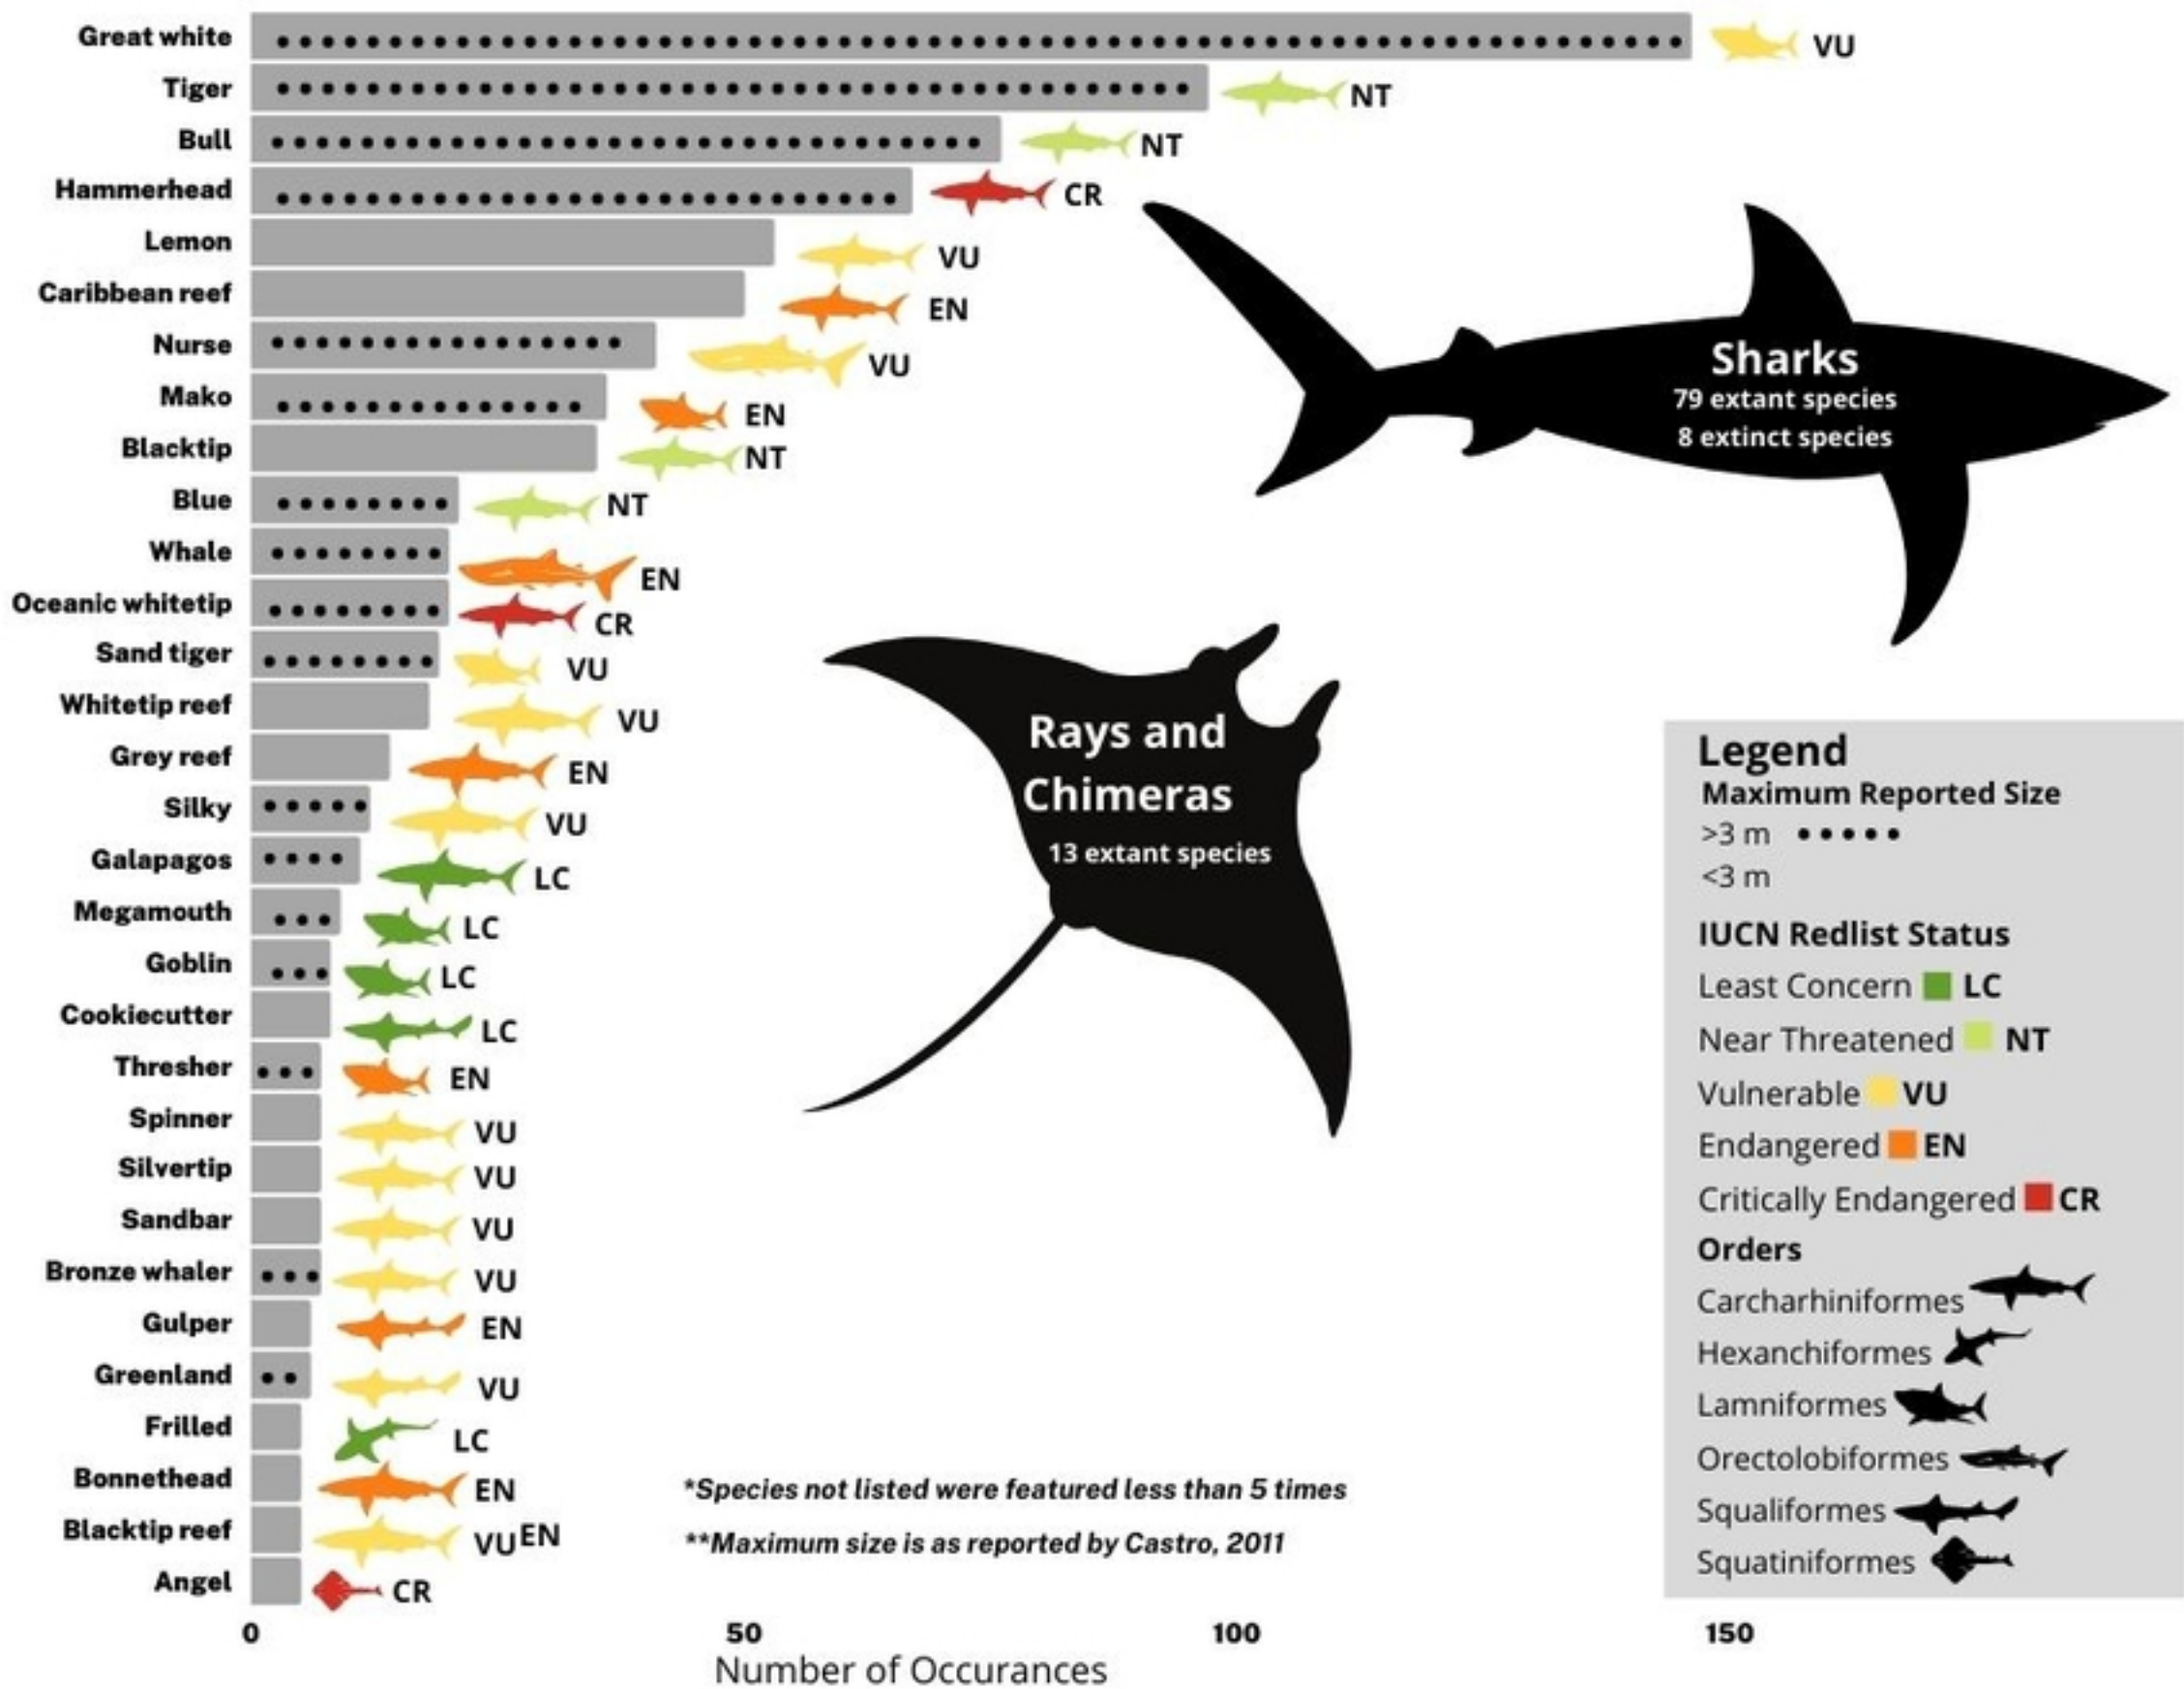

Figure 8

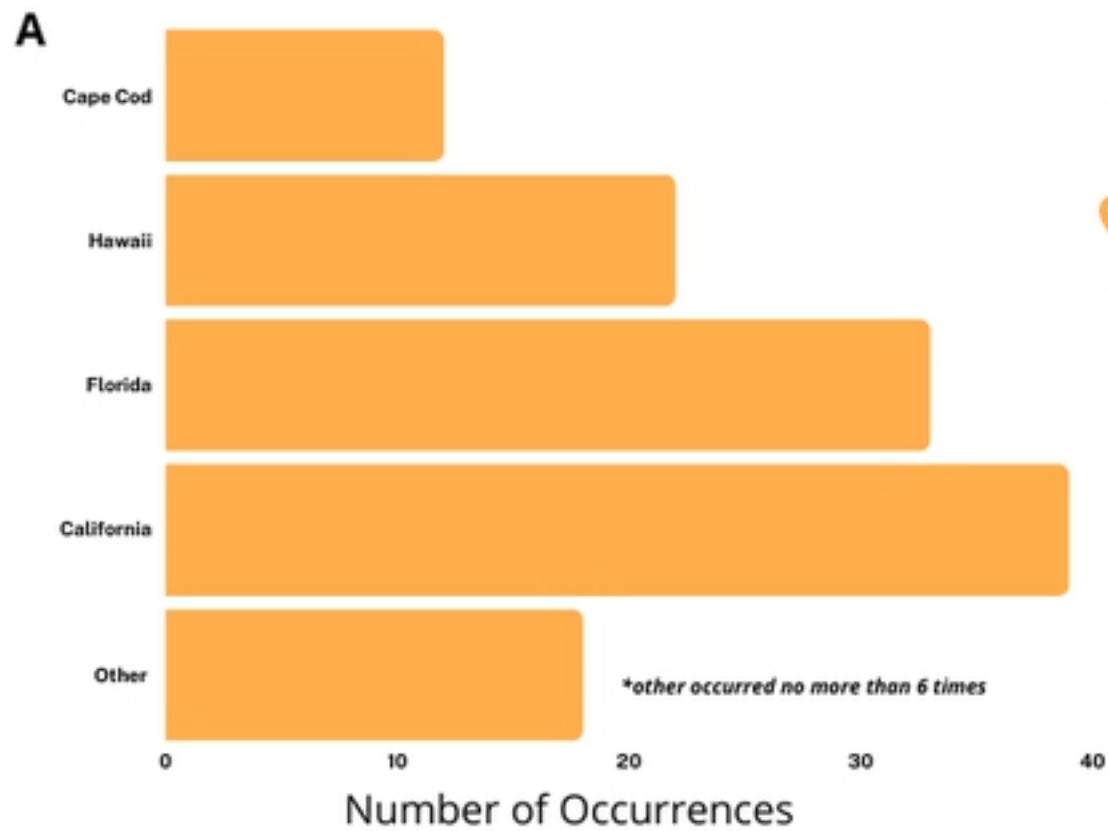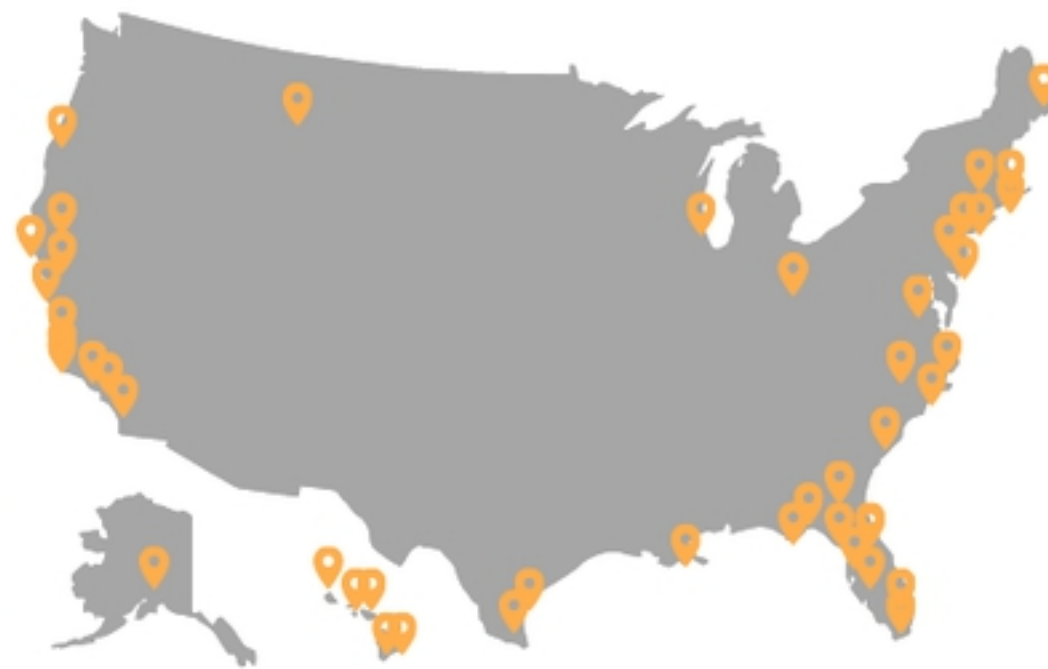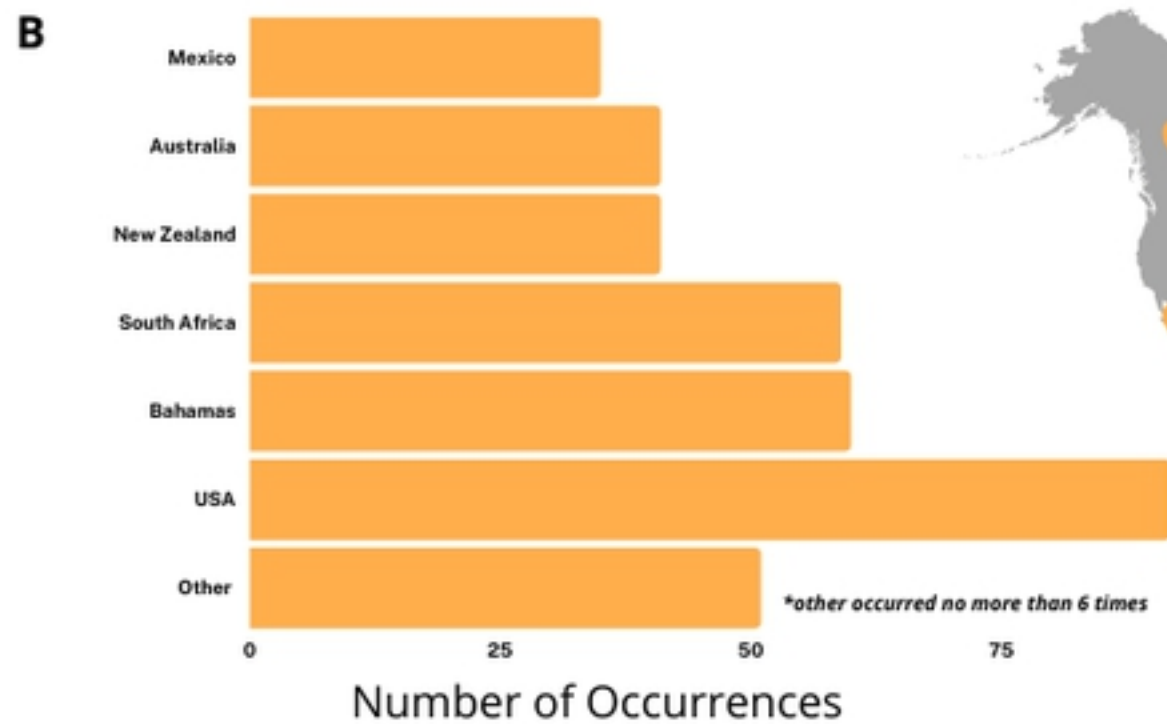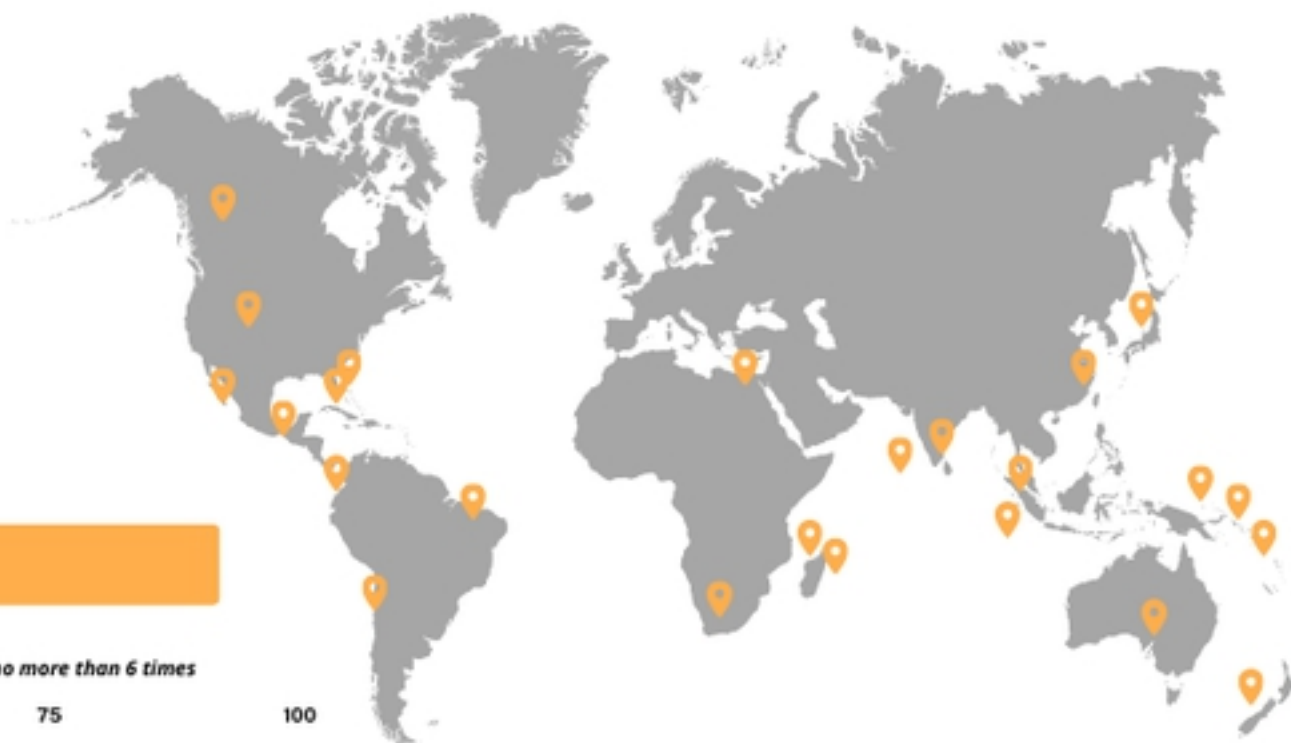

Figure 9
